# Supplementary material
Source: Royal Society of Chemistry journal article supplement (doi:10.1039/d6ee01796g)
Supplement: d6ee01796g1.pdf [file d6ee01796g1.pdf]

## Supplementary information

# Modulating Interfacial Ion Flux via Electrode Coatings Enables Efficient Acidic CO<sub>2</sub> Electrolysis

Xiaotong Li<sup>‡,a</sup>, Xinhui Guo<sup>‡,a,b</sup>, Qian Liu<sup>‡,c</sup>, Yunxia He<sup>c</sup>, Youwen Rong<sup>a,d</sup>, Zijian Tan<sup>a,b</sup>, Yiyuan Jiang<sup>a</sup>, Zhou Chen<sup>\*,e</sup>, Dunfeng Gao<sup>\*,a,b</sup>, Guoxiong Wang<sup>\*,a,d</sup>, Xinhe Bao<sup>a</sup>

<sup>a</sup>State Key Laboratory of Catalysis, Dalian National Laboratory for Clean Energy, iChEM (Collaborative Innovation Center of Chemistry for Energy Materials), Dalian Institute of Chemical Physics, Chinese Academy of Sciences, Dalian 116023, China

<sup>b</sup>University of Chinese Academy of Sciences, Beijing 100049, China

<sup>c</sup>Hoffmann Institute of Advanced Materials, Shenzhen Polytechnic University, 7098 Liuxian Boulevard, Shenzhen 518055, China

<sup>d</sup>Department of Chemistry, Advanced Institute for Future Energy, Shanghai Key Laboratory of Electrochemical and Thermochemical Conversion for Resources Recycling, iChEM (Collaborative Innovation Center of Chemistry for Energy Materials), State Key Laboratory of Porous Materials for Separation and Conversion, Fudan University, Shanghai 200438, China

<sup>e</sup>College of Materials, Xiamen University, Xiamen 361005, China

<sup>‡</sup>These authors contributed equally: Xiaotong Li, Xinhui Guo, Qian Liu

\*Corresponding authors Emails: [zhouchen@xmu.edu.cn](mailto:zhouchen@xmu.edu.cn) (Zhou Chen); [dfgao@dicp.ac.cn](mailto:dfgao@dicp.ac.cn) (Dunfeng Gao); [wanggx@dicp.ac.cn](mailto:wanggx@dicp.ac.cn) (Guoxiong Wang)

## Methods

### Chemicals and Materials

Carbon particles (Vulcan XC-72R, Cabot), cobalt (II) phthalocyanine (CoPc, 90.0%), aluminum oxide ( $\text{Al}_2\text{O}_3$ , 99%), and Nafion 117 dispersion (5 wt% in a mixture of lower aliphatic alcohols and water) were purchased from Macklin Corp. Potassium sulfate ( $\text{K}_2\text{SO}_4$ , 99%), sodium borohydride ( $\text{NaBH}_4$ , 98%), bismuth chloride ( $\text{BiCl}_3$ , 98%), trisodium citrate dihydrate ( $\text{Na}_3\text{C}_6\text{H}_5\text{O}_7 \cdot 2\text{H}_2\text{O}$ , 99%), sulfuric acid ( $\text{H}_2\text{SO}_4$ , 95~98%), *N, N*-dimethylformamide (DMF, 99.5%), ethanol (99.7%), and methanol (99.7%) were purchased from Sinopharm Corp. Cerium oxide ( $\text{CeO}_2$ , 99.99%) was purchased from Energy Corp. Titanium oxide ( $\text{TiO}_2$ , 99.8%, anatase phase) was obtained from Aladdin Corp. Carbon nanotubes (CNTs) was supplied by XFNANO Corp. Sustainion® XA-9 dispersion (5 wt% in ethanol) was purchased from SCI-Materials-Hub Corp, and Aquivion® D79-25BS (25 wt% in water) was obtained from Sinerio Corp. Polyvinylidene fluoride (PVDF) was Solef® 5130. Polytetrafluoroethylene membrane (PTFE) with a pore size of 0.45  $\mu\text{m}$  was purchased from Beijing Zhongxingweiye Instrument Company. Glass fiber was Whatman GF/D 1823. Ultrapure water (18.2 M $\Omega$ ) was used in all experiments.

A 5 wt% PVDF dispersion was prepared by dissolving 0.5 g of PVDF powder in 9.5 g of DMF under continuous stirring at 300 rpm for 24 h, and was used immediately after preparation. All other chemicals were used as received without further treatment.

### Catalyst synthesis and electrode preparation

#### 1. Synthesis of Bi/C nanoparticles

The Bi/C nanoparticles were synthesized via a chemical reduction method. Briefly, 0.5 mmol of bismuth chloride ( $\text{BiCl}_3$ ) and 8 mmol of trisodium citrate dihydrate ( $\text{Na}_3\text{C}_6\text{H}_5\text{O}_7 \cdot 2\text{H}_2\text{O}$ ) were dissolved in 200 mL of deionized water, followed by the addition of 0.2 g of carbon nanoparticles (Vulcan XC-72R). After sonication for 2 h, a sodium borohydride solution (30 mmol of  $\text{NaBH}_4$  in 300 mL of ethanol) was added, and the mixture was stirred at 500 rpm for 30 min. The Bi/C nanoparticles were collected by centrifugation, washed three times each with deionized water and ethanol, and dried in a vacuum oven at 60 °C for 24 h.

#### 2. Preparation of Cu electrode

A hydrophobic PTFE membrane with a pore size of 0.45  $\mu\text{m}$  was used directly as the substrate. The Cu electrode was fabricated using a magnetron sputtering system equipped with a high-purity Cu target (99.999%). The sputtering parameters were set as follows: power, 100 W; Ar flow rate, 37 mL  $\text{min}^{-1}$ ; pressure, 6.1 mTorr; sputtering rate, 16 nm  $\text{min}^{-1}$ ; and sputtering time, 25 min.

#### 3. Preparation of a coating-modified Cu electrode

A drop-casting method was used to fabricate coating-modified Cu electrodes. First, a filler-binder composite slurry was prepared by sonication. This slurry was then drop-casted onto the Cu film and dried on a hot plate at 80 °C in a fume hood. Detailed preparation procedures for each type of coated Cu electrode were described in detail below.

For the carbon-binder composite-coated Cu electrode, 8 mg of carbon (Vulcan XC-72R or carbon nanotubes) and 40 mg of Nafion 117 dispersion (5 wt%), 40 mg of Sustainion® XA-9 dispersion (5 wt%), or 8 mg of Aquivion® D79-25BS dispersion (25 wt%) were dispersed in 10 mL of methanol and sonicated for 1 h to obtain a homogeneous slurry. When PVDF (5 wt%) was employed as the binder, DMF served as the dispersing solvent. The binder content in the slurry was fixed at 20 wt%, unless otherwise noted. The resulting coated Cu electrodes were denoted as C/CEI-Cu (Nafion 117 as binder), C/CEI<sub>Low</sub>-Cu (Aquivion® D79-25BS as binder), C/AEI-Cu (Sustainion® XA-9 as the binder), C/NI-Cu (PVDF as the binder), and CNTs/CEI-Cu (CNTs as filler and Nafion 117 as binder). Moreover, 20 mg and 60 mg of Nafion 117 dispersion, corresponding to 11 wt% and 27 wt% Nafion 117 content in the slurry, respectively, were also mixed with 8 mg of carbon nanoparticles, yielding the C/CEI<sub>11wt%</sub>-Cu and C/CEI<sub>27wt%</sub>-Cu electrodes. ~2.3 μm-thick and ~5 μm-thick coatings corresponded to the C/CEI loading of 0.4 and 0.8 mg cm<sup>-2</sup>, respectively.

For the oxide-CEI composite-coated Cu electrodes, 10 mg of metal oxides (Al<sub>2</sub>O<sub>3</sub>, CeO<sub>2</sub>, and TiO<sub>2</sub>) and 40 mg of Nafion 117 dispersion were dispersed in 4 mL of ethanol and sonicated for 1 h to form a homogeneous slurry. The resulting electrodes were denoted as Al<sub>2</sub>O<sub>3</sub>/CEI-Cu, CeO<sub>2</sub>/CEI-Cu, and TiO<sub>2</sub>/CEI-Cu. Moreover, Al<sub>2</sub>O<sub>3</sub>/CEI<sub>Low</sub>-Cu, Al<sub>2</sub>O<sub>3</sub>/NI-Cu, and Al<sub>2</sub>O<sub>3</sub>/AEI-Cu electrodes were prepared by replacing the Nafion 117 dispersion in the composite slurry with Aquivion® D79-25BS, PVDF, and Sustainion® XA-9 dispersions, respectively.

For the CEI-coated Cu electrode, 10 mg of Nafion 117 dispersion was diluted in 2 mL of ethanol and drop-casted directly onto the Cu film. The resulting electrode was denoted as CEI-Cu.

#### **4. Preparation of coating-modified CoPc and Bi electrode**

For the coating-modified CoPc electrode, a CoPc catalyst layer was first prepared by drop-casting a slurry containing 1.9 mg of CoPc, 7.7 mg of XC-72R, and 19.3 mg of Nafion 117 dispersion in 5 mL of ethanol onto a gas diffusion electrode (GDE, YLS-30T, 2.2 × 2.2 cm<sup>2</sup>), followed by drying on a hot plate at 80 °C. An Al<sub>2</sub>O<sub>3</sub>/CEI coating was subsequently deposited on the CoPc catalyst layer. The resulting electrode was denoted as Al<sub>2</sub>O<sub>3</sub>/CEI-CoPc.

For the coating-modified Bi electrode, a Bi catalyst layer was first fabricated by drop-casting a slurry containing 10 mg of Bi/C nanoparticles and 22.2 mg of Nafion 117 dispersion in 5 mL of ethanol onto a GDE and drying on a hot plate at 80 °C. An Al<sub>2</sub>O<sub>3</sub>/CEI coating was then deposited on the Bi catalyst layer. The resulting electrode was denoted as Al<sub>2</sub>O<sub>3</sub>/CEI-Bi.

#### **Material characterization**

The morphologies of samples were characterized using a field-emission scanning electron microscope (SEM, JSM-7900F), equipped with an energy-dispersive X-ray spectroscopy (EDS) system. Water contact angles were measured with a drop shape analyzer (DSA100). Cross-sectional specimens were prepared and imaged using a focused ion beam-scanning electron microscope (FIB-SEM, Helios 5CX) equipped with an EDS

system, with the sample stage tilted at 52°. Powder X-ray diffraction (XRD) patterns of the catalysts were recorded with a PANalytical X'pert PPR diffractometer with a Cu K $\alpha$  radiation source ( $\lambda=1.5418 \text{ \AA}$ ) at 40 kV and 40 mA at a scan rate of 10° min<sup>-1</sup>. X-ray photoelectron spectroscopy (XPS) and Auger electron spectroscopy (AES) measurements were performed on an ESCALab 250Xi+ system (Thermo Fisher Scientific).

### Evaluation of acidic CO<sub>2</sub> electrolysis performance

Acidic CO<sub>2</sub> electrolysis was performed in a flow cell consisting of a graphite flow-field plate, a catholyte chamber, an anolyte chamber, and a titanium backplate. The electrolysis was carried out in chronopotentiometry mode using an Autolab PGSTAT302N workstation equipped with a current booster (10 A), operating in a three-electrode configuration. Ir black deposited on Ti foam, an Ag/AgCl, and the as-prepared electrode were used as the counter, reference, and working electrodes, respectively. The catholyte and anolyte chambers were separated by a Nafion 211 membrane. A CO<sub>2</sub> gas stream containing 5% N<sub>2</sub> (as an internal standard) was continuously fed to the back side of the cathode at a flow rate of 20 mL min<sup>-1</sup>, controlled by a mass flow controller (MFC), unless otherwise noted. Freshly prepared 0.5 M K<sub>2</sub>SO<sub>4</sub> (adjusted to pH 2 with H<sub>2</sub>SO<sub>4</sub>) and 0.2 M H<sub>2</sub>SO<sub>4</sub> were continuously supplied to the catholyte and anolyte chambers, respectively, unless otherwise stated. The electrolyte flow rate was maintained at 5 mL min<sup>-1</sup> using a peristaltic pump in a non-recirculating mode.

To evaluate the energy efficiency, full-cell measurements were carried out in a slim flow cell equipped with a graphite flow-field plate, a 1.2 mm-thick catholyte chamber, and a titanium flow-field plate for anolyte supply. A two-electrode configuration was adopted. All other operating conditions were identical to those used in the aforementioned flow cell.

The gaseous and liquid products from CO<sub>2</sub> electrolysis were quantified using online gas chromatography (GC) and <sup>1</sup>H nuclear magnetic resonance spectroscopy (<sup>1</sup>H NMR), respectively. The Faradaic efficiency (FE) of electrolysis products was calculated according to Equation (1). The single-pass CO<sub>2</sub> conversion efficiency (SPCE) was determined using Equation (2). The full-cell energy efficiency (EE) for acidic CO<sub>2</sub> electrolysis was calculated according to Equation (3). The working potentials were converted to the reversible hydrogen electrode (RHE) scale with an 85 % *iR* compensation, as shown in Equation (4).

$$FE = \frac{z \times F \times n}{Q} \quad (1)$$

where *z* is the electron transfer for a specific product molecule, *F* is the Faraday's constant (96485 C mol<sup>-1</sup>), *n* is the amount of product (in mol), and *Q* is the total charge passed (in C).

$$SPCE (\%) = \frac{j_{\text{products}} \times 60 \times t}{z \times F} \times \frac{V_m}{v \times t} \quad (2)$$

where *j*<sub>products</sub> is the partial current of a specific product (in A), *t* is the running time (in min), *V*<sub>m</sub> is the molar volume (= 24500 mL mol<sup>-1</sup>), and *v* is the flow rate of CO<sub>2</sub> (in mL min<sup>-1</sup>). The SPCE for C<sub>2+</sub> products was calculated as the sum of the SPCEs of all individual C<sub>2+</sub> products.

$$EE (\%) = \frac{E_{product}^n \times FE_{product}}{E_{cell}} \quad (3)$$

where  $E_{product}^n$  is the thermoneutral voltage for the formation of a specific product,  $E_{cell}$  is the full-cell voltage (without Ohmic loss correction), and  $FE_{product}$  is the calculated FE for the corresponding product. The EE for total CO<sub>2</sub> electrolysis products or for C<sub>2+</sub> products was calculated as the sum of the EE values of the respective products.

$$E \text{ (vs RHE)} = E \text{ (vs Ag/AgCl)} + 0.198 + 0.059 \times \text{pH} - 0.85 \times iR \quad (4)$$

where  $i$  is the current (in A) and  $R$  is the solution resistance (in  $\Omega$ ).

### HER polarization behavior measurement

The hydrogen evolution reaction (HER) polarization behavior of the electrode was evaluated by linear sweep voltammetry (LSV) in an H-cell separated by a Nafion 117 membrane. The catholyte and anolyte chambers were filled with Ar-saturated 0.5 M K<sub>2</sub>SO<sub>4</sub> (pH 2) and 0.2 M H<sub>2</sub>SO<sub>4</sub>, respectively. The electrode (geometric area: 1 cm<sup>2</sup>), Ag/AgCl, and Pt wire electrode served as the working, reference, and counter electrodes, respectively. During the measurements, the catholyte was stirred at 300 rpm using a magnetic stirrer. LSV tests were conducted over a potential range of  $-0.1$  V to  $-2.0$  V vs RHE at a scan rate of 10 mV s<sup>-1</sup>. The potential was converted to the RHE scale without  $iR$  compensation.

### K<sup>+</sup> adsorption measurement

An electrode (geometric area: 1 cm<sup>2</sup>) was first immersed in 0.5 M K<sub>2</sub>SO<sub>4</sub> (pH 2) and polarized at a constant potential of  $-1.2$  V vs RHE for 60 s, followed by transferring it into 10 mL of deionized water and shaking for 10 s. This process was repeated 5 times to collect the K<sup>+</sup> ions adsorbed on the electrode surface. During each transfer, the applied potential was maintained. An electrode without a potential application served as the blank control. The K<sup>+</sup> concentration in the collected deionized water was quantified using ion chromatography (DIONEX ICS-5000, Thermo Fisher Scientific). The adsorbed-K<sup>+</sup> concentration for each electrode was determined by subtracting the K<sup>+</sup> concentration measured under the blank condition from that obtained under polarization.

### Ion-exchange properties measurement

A carbon-binder composite slurry was spray-coated on both sides of a glass fiber (GF-D) substrate to prepare the separator. The separator was then placed in the middle of an H-cell. In one chamber, 30 mL of 0.05 M H<sub>2</sub>SO<sub>4</sub> or 1 M KOH aqueous solution was used as the donor solution, while the other chamber was filled with 30 mL of deionized water or 0.5 mM KOH as the receiver solution, respectively. The pH evolution of the receiver solution was monitored over time using a pH meter, providing insights into the H<sup>+</sup> or OH<sup>-</sup> exchange ability of different binders.

### Rotating disk electrode (RDE) measurement

RDE measurements were carried out using a DEINTYCO rotator (RRDE-1A) in an Ar-saturated 0.5 M K<sub>2</sub>SO<sub>4</sub> electrolyte (pH 2). Before each measurement, the Cu disk

electrode (5 mm in diameter) was sequentially sonicated in 0.1 M HNO<sub>3</sub>, deionized water, acetone, and deionized water for 2 min each, followed by mechanical polishing with 50 nm alumina polishing powder and a final sonication in deionized water for 3 min. To prepare the modified Cu disk electrodes, 20 mg of oxide (Al<sub>2</sub>O<sub>3</sub>, CeO<sub>2</sub>, or TiO<sub>2</sub>) and 220 mg of Nafion 117 dispersion were dispersed in 2 mL of ethanol and sonicated for 1 h. Then, 20 μL of the resulting slurry was drop-casted onto the Cu disk electrode and dried under infrared light. During measurements, an Ag/AgCl electrode and a Pt wire were used as reference and counter electrodes, respectively. Cyclic voltammetry (CV) tests were recorded over a potential range of −0.1 V to −2.5 V vs RHE at a scan rate of 50 mV s<sup>−1</sup> and rotation rates of 400, 800, 1200, 1600, and 2400 rpm.

The effective proton diffusion coefficient ( $D_{H^+, \text{eff}}$ ) can be inferred from the slope of the linear fit between the proton mass-transfer-limited plateau current density ( $|j_{\text{plateau}}|$ ) and the square root of rotation rate ( $\omega^{1/2}$ ), using the Levich equation (Equation 5). In this work, this slope was used as a quantitative indicator of  $D_{H^+, \text{eff}}$ .

$$j_{\text{plateau}} = 0.62 \times n \times F \times A \times D^{2/3} \times \nu^{-1/6} \times c \times \omega^{1/2} \quad (5)$$

where  $n$  is the number of electrons transferred in the reaction,  $F$  is the Faraday's constant,  $A$  is the electrode surface area,  $D$  is the proton diffusion coefficient,  $\nu$  is the kinematic viscosity of the electrolyte,  $c$  is the proton concentration, and  $\omega$  is the angular rotation rate.

The decrease in the  $D_{H^+, \text{eff}}$  for the modified Cu RDE was quantified using Equation (6).

$$\frac{D_{\text{modified Cu RDE}}}{D_{\text{Cu RDE}}} = \left( \frac{\text{slope}_{\text{modified Cu RDE}}}{\text{slope}_{\text{Cu RDE}}} \right)^2 \quad (6)$$

### Quasi-*in situ* XPS measurement

The Cu and Al<sub>2</sub>O<sub>3</sub>/CEI-Cu electrodes were electrolyzed for 30 min at 400 mA cm<sup>−2</sup> under acidic CO<sub>2</sub> electrolysis conditions in a glovebox and subsequently transferred into a sealed XPS UHV chamber for XPS and AES measurements.

### *In situ* X-ray absorption spectroscopy measurement

X-ray absorption (XAS) spectroscopy was carried out using the *RapidXAFS* 2M (Anhui Absorption Spectroscopy Analysis Instrument Co., Ltd.) by transmission mode at 20 kV and 20 mA, and the Si (553) spherically bent crystal analyzer with a radius of curvature of 500 mm was used for Cu. The energy was calibrated to the absorption edge of a Cu foil (8979 eV). *In situ* XAS was carried out in a three-electrode system on the electrochemical workstation (CHI760E) with CO<sub>2</sub>-saturated 0.5 M K<sub>2</sub>SO<sub>4</sub> (pH 2) as the catholyte. Potentiostatic electrolysis was carried out at −1.02 V and −2.02 V vs Ag/AgCl. Every spectrum was recorded after 2 min of continuous CO<sub>2</sub> electrolysis.

### *In situ* Raman spectroscopy measurement

*In situ* Raman spectroscopy was carried out using an *inVia* Reflex Raman microscope (Renishaw) equipped with a 785 nm diode laser and a 50 × water immersion objective in a commercial Raman flow cell (C031-3, Gaoss Union). The spectrometer was first calibrated

using the characteristic Raman band of a silicon wafer. Each spectrum was then collected in static mode with 1% laser power and an exposure time of 60 s.

During electrochemical testing, 0.5 M K<sub>2</sub>SO<sub>4</sub> (pH 1) and 0.2 M H<sub>2</sub>SO<sub>4</sub> were continuously supplied to catholyte and anolyte chambers, respectively, at a flow rate of 20 mL min<sup>-1</sup>. CO<sub>2</sub> gas was continuously fed to the backside of the cathode at a flow rate of 10 mL min<sup>-1</sup>. The CO<sub>2</sub> electrolysis was carried out in a chronoamperometry mode on an Ivium workstation using a three-electrode configuration, with an Ag/AgCl electrode and a carbon rod serving as reference and counter electrodes, respectively. The applied potential ranged from -0.67 V to -0.92 V vs Ag/AgCl with a potential interval of -0.05 V.

To determine the local pH, a calibration curve was established by correlating the logarithm of the Gaussian-fitted Raman peak area ratio of CO<sub>3</sub><sup>2-</sup> to HCO<sub>3</sub><sup>-</sup> with the bulk pH. Calibration solutions were prepared by dissolving K<sub>2</sub>CO<sub>3</sub> and KHCO<sub>3</sub> at various concentration ratios, maintaining a total K<sup>+</sup> concentration of 1 M.

### ***In situ* attenuated total reflectance surface-enhanced infrared absorption spectroscopy measurement**

*In situ* ATR-SEIRAS measurement was conducted using an INVENIO S FTIR spectrometer with an MCT detector. A home-made H-cell was used for ATR-SEIRAS measurement, with a Pt wire as a counter electrode and an Ag/AgCl electrode as a reference electrode. The catholyte was CO<sub>2</sub>-saturated 0.5 M K<sub>2</sub>SO<sub>4</sub> (pH 1), and the anolyte was 0.2 M H<sub>2</sub>SO<sub>4</sub>. For the working electrode, an Au film was sputtered onto a silicon prism, followed by drop-casting a catalyst ink onto the Au film. All spectra were recorded as a relative change in absorbance, referenced to background spectra collected at open-circuit potential (OCP).

### **COMSOL Multiphysics simulation**

A one-dimensional domain was constructed in COMSOL Multiphysics 6.0 to simulate local species concentrations in the vicinity of electrodes (**Scheme S1**). The computational domain comprised three sequential regions: the catalyst layer, the filler layer, and the diffusion layer. Mass transport was described using the steady-state Nernst-Planck equations coupled with the electroneutrality condition:

$$\nabla j_i = R_i \quad (7)$$

$$j_i = -D_i \nabla c_i - z_i u_{m,i} F c_i \nabla V \quad (8)$$

$$\sum_i z_i c_i = 0 \quad (9)$$

$$i = \text{CO}_2, \text{HCO}_3^-, \text{CO}_3^{2-}, \text{H}^+, \text{OH}^-, \text{K}^+, \text{SO}_4^{2-}$$

where  $j_i$  is the flux of species  $i$ .  $R_i$  is the reaction term, accounting for contributions from charge-transfer reactions and carbonate equilibria. The operator  $\nabla$  stands for the spatial derivative ( $d/dx$ ).  $c_i$  is the concentration of species  $i$  in solution, while  $D_i$ ,  $z_i$ , and  $u_i$  correspond to its diffusivity, charge number, and ion mobility, respectively.  $F$  is the Faraday constant. The  $V$  represents the potential.

In the catalyst layer and filler layer, the diffusion coefficients were corrected for porosity. The effective diffusion coefficients were calculated using the Bruggeman relation:

$$D_{i,eff} = \frac{\varepsilon_p}{\tau_p} D_{F,i} \quad (10)$$

$$\tau_p = \varepsilon_p^{-1/2} \quad (11)$$

where  $D_{F,i}$  is the bulk diffusion coefficient of species  $i$ ,  $\varepsilon_p$  is porosity (assumed to be 0.7), and  $\tau_p$  is the tortuosity. For coated Cu electrodes with a low- $D_{H^+, eff}$  coating, the diffusion coefficients in the filler layer were further reduced by a factor of 0.1.

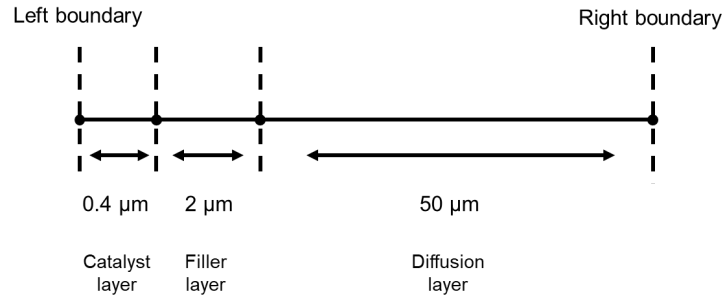

**Scheme S1.** The modelling geometry of the coated Cu electrode.

The hydrogen evolution reaction (HER) and acidic  $\text{CO}_2$  electrolysis take place in the catalyst layer, where  $\text{CO}_2$  is consumed and  $\text{OH}^-$  is generated. The FEs were assumed to be 15 % for  $\text{H}_2$ , 20 % for  $\text{CO}$ , 5 % for  $\text{CH}_4$ , 5 % for  $\text{HCOOH}$ , 30 % for  $\text{C}_2\text{H}_4$ , 10 % for  $\text{C}_2\text{H}_5\text{OH}$ , 10 % for  $\text{CH}_3\text{OOH}$ , and 5 % for  $\text{C}_3\text{H}_7\text{OH}$ .

Homogeneous reactions were presented in all domains. The reversible reactions among  $\text{H}^+$ ,  $\text{OH}^-$ ,  $\text{CO}_2$ ,  $\text{HCO}_3^-$ , and  $\text{CO}_3^{2-}$  included in the model were:

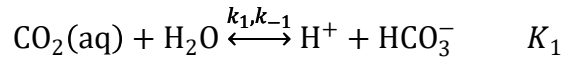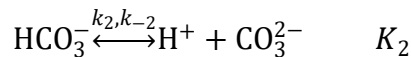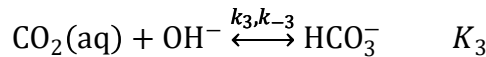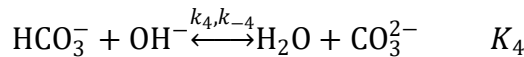

At the left boundary, a constant  $\text{CO}_2$  concentration was imposed, while zero-flux conditions were applied to all other aqueous species. The aqueous  $\text{CO}_2$  concentration ( $[\text{CO}_2]_{\text{aq}}$ ) was calculated from the gas-phase pressure, temperature, and solution salinity using Henry's law and the Séchenov equation<sup>1</sup>. At the right boundary, equilibrium concentration values corresponding to the bulk electrolyte were imposed.

Henry's law is given by:

$$[\text{CO}_2]_{\text{aq, H}} = K_H[\text{CO}_2]_{\text{g}} \quad (12)$$

$$K_H = 93.4517 \left( \frac{100}{T} \right) - 60.2409 + 23.3585 \left( \frac{100}{T} \right) \quad (13)$$

where  $K_H$  is Henry's constant (34.1 mM atm<sup>-1</sup> at  $T = 298.15$  K).  $T$  is the temperature of the solution in K.

The Séchenov equation is expressed as:

$$\log \left( \frac{[\text{CO}_2]_{\text{aq, H}}}{[\text{CO}_2]_{\text{g}}} \right) = K_s [C_s] \quad (14)$$

where  $K_s$  is the Séchenov constant and  $[C_s]$  is the molar concentration of the electrolyte.

$$K_s = \sum (h_{\text{ion}} - h_G) \quad (15)$$

$$h_G = h_{G,o} + h_T(T - 298.15) \quad (16)$$

$h_{\text{ion}}$ ,  $h_{G,o}$ , and  $h_T$  is ion-specific parameter, gas-specific parameter, and gas-specific parameter, respectively.

**Table S1.** Diffusion coefficient in bulk solution.

| Ion                           | Diffusion coefficient (10 <sup>-9</sup> m <sup>2</sup> s <sup>-1</sup> ) |
|-------------------------------|--------------------------------------------------------------------------|
| H <sup>+</sup>                | 9.310                                                                    |
| K <sup>+</sup>                | 1.957                                                                    |
| OH <sup>-</sup>               | 5.273                                                                    |
| SO <sub>4</sub> <sup>2-</sup> | 1.065                                                                    |
| CO <sub>3</sub> <sup>2-</sup> | 0.923                                                                    |
| HCO <sub>3</sub> <sup>-</sup> | 1.185                                                                    |
| CO <sub>2</sub>               | 1.910                                                                    |

**Table S2.** The homogeneous reaction parameters.

| Parameter      | Explanation          | Value                          | Unit                                | Reference |
|----------------|----------------------|--------------------------------|-------------------------------------|-----------|
| K <sub>1</sub> | Equilibrium constant | 4.27×10 <sup>-7</sup>          | mol L <sup>-1</sup>                 | 2         |
| K <sub>2</sub> | Equilibrium constant | 4.59×10 <sup>-11</sup>         | mol L <sup>-1</sup>                 | 2         |
| K <sub>3</sub> | Equilibrium constant | K <sub>1</sub> /K <sub>w</sub> | mol <sup>-1</sup> L s <sup>-1</sup> | 2         |
| K <sub>4</sub> | Equilibrium constant | K <sub>4</sub> /K <sub>w</sub> | mol <sup>-1</sup> L                 | 2         |

|          |                                     |                       |                                   |   |
|----------|-------------------------------------|-----------------------|-----------------------------------|---|
| $K_w$    | Dissociation constant of water      | $10^{-14}$            | $\text{mol}^{-2} \text{L}^2$      | 3 |
| $k_{w1}$ | Rate constant of water dissociation | $10^{-3}$             | $\text{mol L}^{-1} \text{s}^{-1}$ | 4 |
| $k_1$    | Rate constant                       | $3.71 \times 10^{-2}$ | $\text{s}^{-1}$                   | 4 |
| $k_2$    | Rate constant                       | 59.44                 | $\text{s}^{-1}$                   | 4 |
| $k_3$    | Rate constant                       | $2.23 \times 10^3$    | $\text{mol}^{-1} \text{L s}^{-1}$ | 4 |
| $k_4$    | Rate constant                       | $6 \times 10^9$       | $\text{mol}^{-1} \text{L s}^{-1}$ | 4 |

**Table S3.** Séchenov constants.

| Ion                | $h_{\text{ion}}$ |
|--------------------|------------------|
| $\text{K}^+$       | 0.0922           |
| $\text{SO}_4^{2-}$ | 0.1117           |
| $\text{CO}_3^{2-}$ | 0.1423           |
| $\text{OH}^-$      | 0.0839           |
| $\text{HCO}_3^-$   | 0.0967           |
| Other parameters   |                  |
| $h_{G,0}$          | -0.0172          |
| $h_T$              | -0.000338        |

### Theoretical calculation

Density functional theory (DFT) calculations were performed by using the Vienna ab initio simulation package (VASP)<sup>5, 6</sup> with a plane-wave basis set and an energy cutoff of 500 eV. The projector augmented wave (PAW) potential was employed to describe the electron-ion interactions.<sup>7</sup> The generalized gradient approximation with the Perdew-Burke-Ernzerhof (GGA-PBE) functional was applied to treat the exchange-correlation energy.<sup>8, 9</sup> Grimme's semiempirical DFT-D3 dispersion correction was adopted to account for the van der Waals (vdW) interactions.<sup>10</sup> The convergence criteria of the residual Hellmann-Feynman force and total energy during structure optimization were set to  $0.02 \text{ eV } \text{\AA}^{-1}$  and  $10^{-5} \text{ eV}$ , respectively. The  $\text{Al}_2\text{O}_3$  (116),  $\text{CeO}_2$  (311), and  $\text{TiO}_2$  (211) crystal planes were cleaved, and all slab models were modeled with a vacuum layer of  $20 \text{ \AA}$ .

To determine the energy barriers for proton transport and accurately identify the corresponding transition state (TS) structures, the climbing-image nudged elastic band (CI-NEB) method was employed.<sup>11</sup> All atomic positions were fully relaxed during the NEB calculations. After geometry optimization, single-point energy recalculations were performed

for all configurations to correct for systematic errors associated with changes in the plane-wave basis set during structural relaxation, thereby ensuring reliable energy evaluations.

The *ab initio* molecular dynamics (AIMD) simulations were carried out using the Quickstep module with the CP2K package, which enables efficient computations in systems containing plentiful explicit water molecules.<sup>12</sup> The core electrons of Cu, K, H, O, and C atoms were described by the Goedecker-Teter-Hutter (GTH)-type pseudopotentials<sup>13, 14</sup>, while their valence orbitals were expanded using Gaussian and auxiliary plane-wave (GPW)-type double- $\zeta$  basis sets<sup>15</sup> with one set of polarization functions (DZVP)<sup>16</sup>. A plane-wave cutoff of 300 Ry was used for density expansion. The PBE functional<sup>9</sup> was used to describe electron exchange and correlation energies, with Grimme D3 dispersion corrections<sup>10</sup>. During the AIMD simulations, the self-consistent field convergence criterion was set to  $10^{-5}$  Ry for both electronic gradients and total energies, with a timestep of 1 fs. The simulations were run for 2000 fs under a canonical ensemble (NVT), with the temperature maintained at 298.15 K using CSV thermostat<sup>17</sup>. The supercell size is  $13.28 \times 10.22 \times 43.45 \text{ \AA}^3$ , filled with multiple explicit water layers (ca. 50 H<sub>2</sub>O) at a density of  $\sim 1.0 \text{ g cm}^{-3}$ , and a 15  $\text{\AA}$  vacuum region was included to prohibit spurious periodic interactions. Input files for CP2K calculations were generated using the Multiwfn software.<sup>18, 19</sup>

The adsorption energy ( $E_{\text{ads}}$ ) was calculated as follows:

$$E_{\text{ads}} = E_{\text{adsorbate+slab}} - E_{\text{slab}} - E_{\text{adsorbate}} \quad (17)$$

where  $E_{\text{adsorbate+slab}}$ ,  $E_{\text{slab}}$ , and  $E_{\text{adsorbate}}$  are the total energies of the slab with adsorbates, clean slab, and the isolated adsorbate, respectively.

The Gibbs free energy diagrams were calculated following the approach developed by Nørskov et al.,<sup>20</sup> in which the  $\Delta G$  is evaluated as:

$$\Delta G = \Delta E + \Delta \text{ZPE} - T\Delta S + \Delta G_U + \Delta G_{\text{pH}} + \Delta G_{\text{field}} \quad (18)$$

where  $\Delta E$ ,  $\Delta \text{ZPE}$ , and  $\Delta S$  are the reaction energy, the zero-point energy correction, and entropy change, respectively.  $T$  is the temperature (set to 298.15 K).  $\Delta G_U = eU$  is the free energy contribution related to electrode potential  $U$ .  $\Delta G_{\text{pH}}$  is the correction of the H<sup>+</sup> free energy, which can be calculated through  $\Delta G_{\text{pH}} = k_B T \times \ln 10 \times \text{pH}$ . The  $k_B$  is the Boltzmann constant, and pH is set to 0 (acidic medium).  $\Delta G_{\text{field}}$  is the free-energy correction from the electric double layer, which is negligible in this study.

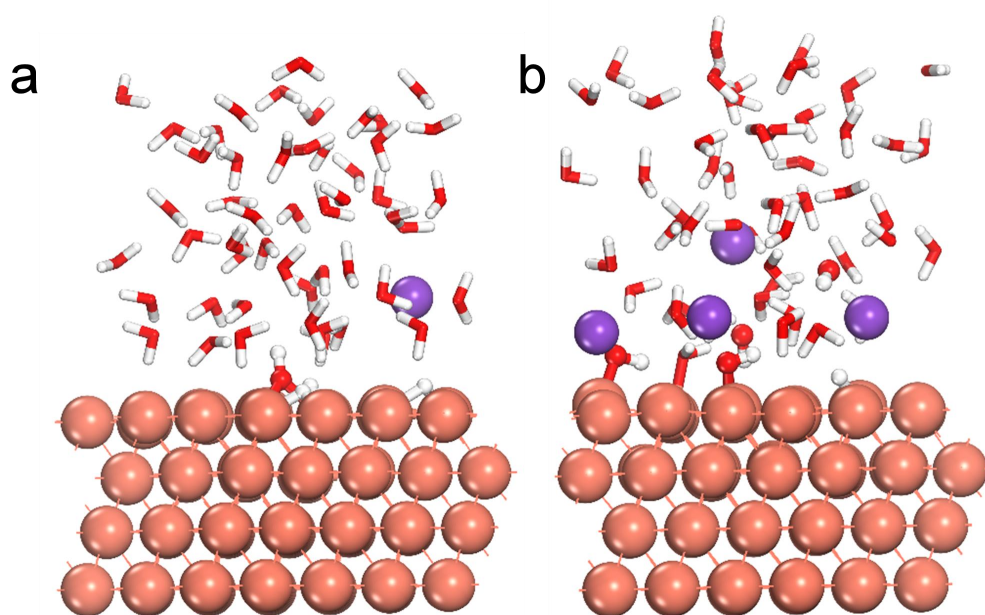

**Fig. S1.** Optimized configurations used in AIMD simulations. Cu (111) surface with (a) one K-OH pair and three H atoms, and (b) four K-OH pairs and one H atom.

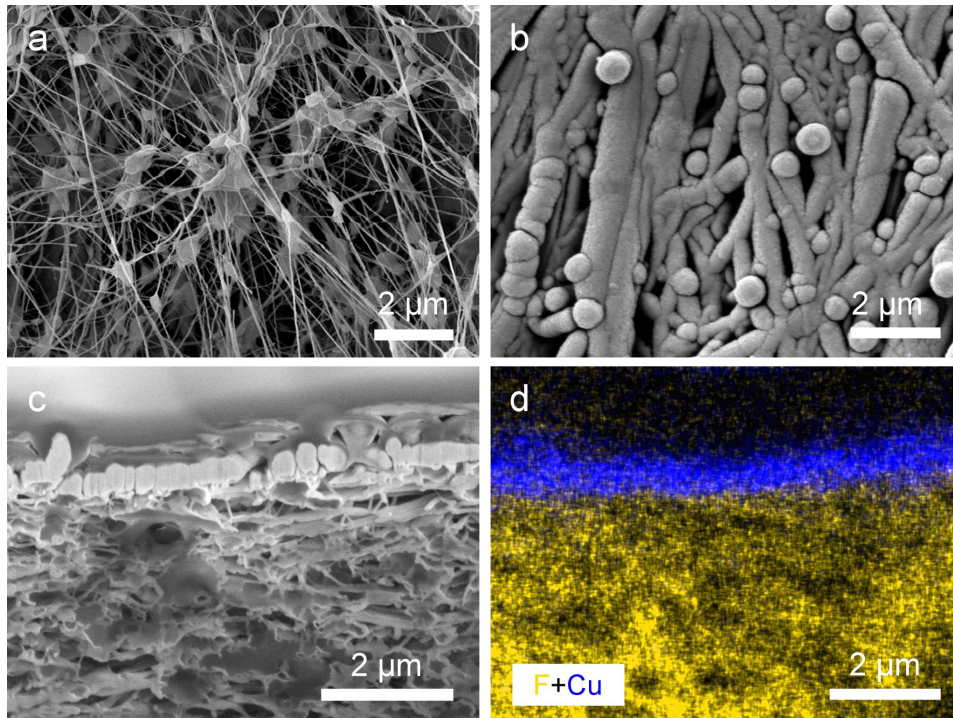

**Fig. S2.** (a-b) SEM images of (a) pristine PTFE membrane and (b) Cu electrode. (c) Focused ion beam (FIB)-milled cross-sectional SEM image acquired at a 52° sample tilt and (d) corresponding EDS elemental maps of the Cu electrode.

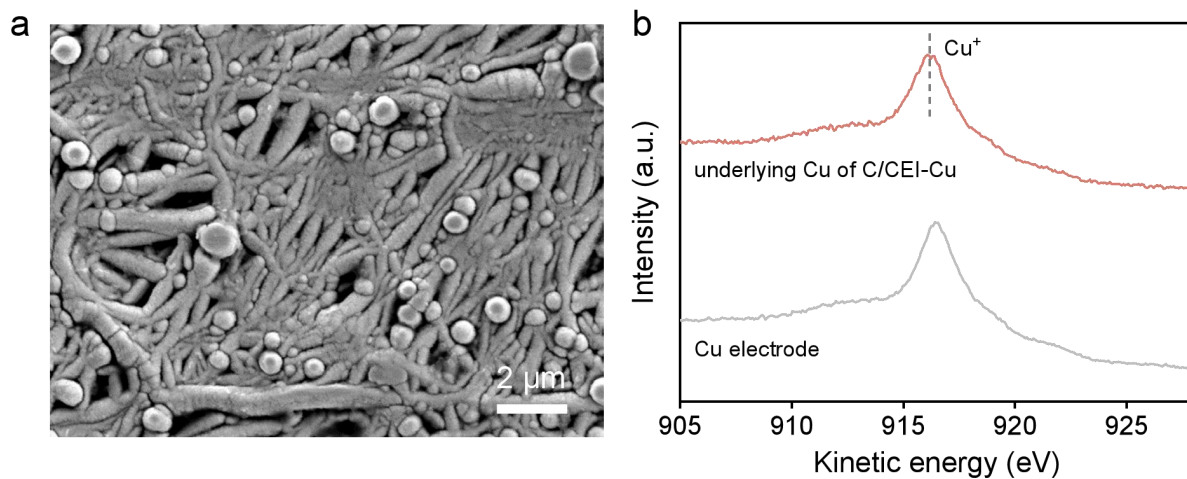

**Fig. S3.** (a) SEM image of the underlying Cu of the C/CEI-Cu electrode. (b) Cu LMM AES spectra of the Cu electrode and the underlying Cu of the C/CEI-Cu electrode.

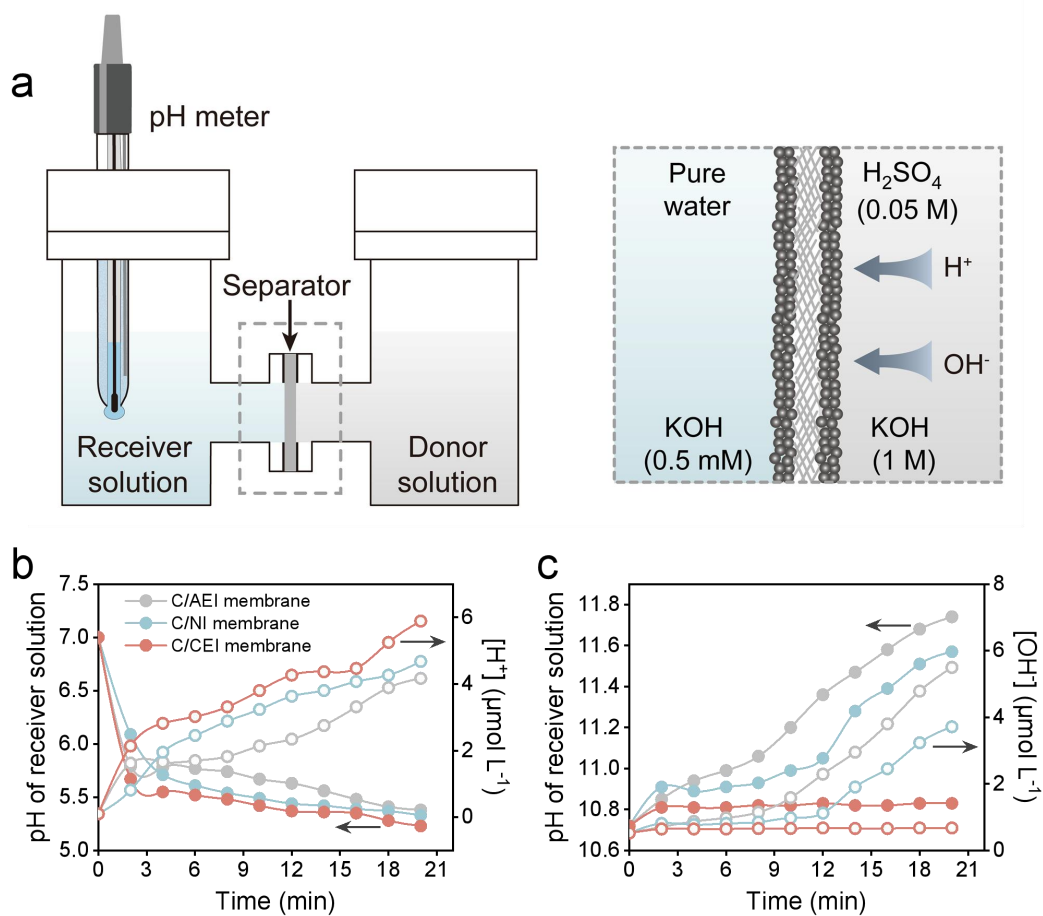

**Fig. S4.** (a) Schematic illustration of the H-cell for ion-exchange properties measurement. (b, c) Time-dependent pH variation in the receiver solution during (b)  $\text{H}^+$ -exchange and (c)  $\text{OH}^-$ -exchange measurements using different membranes.

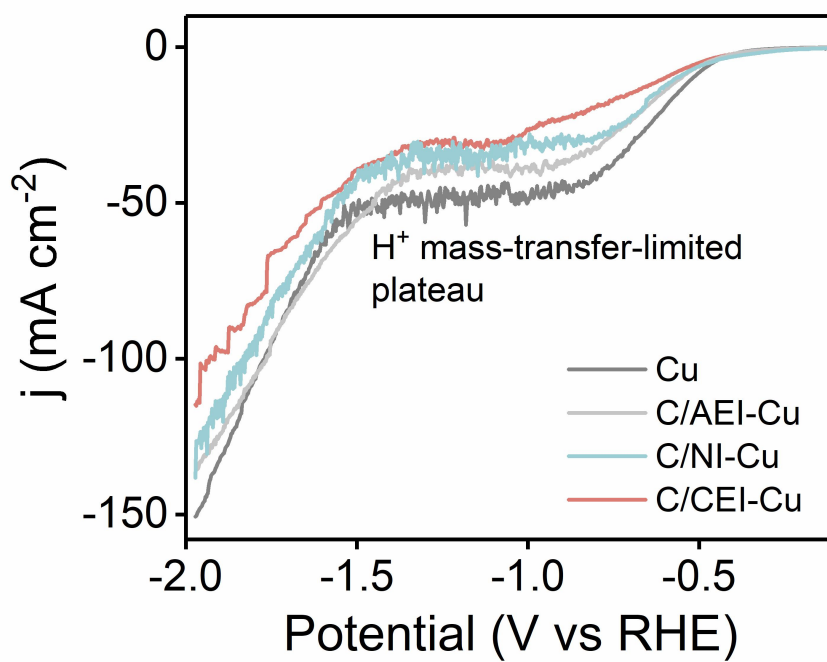

**Fig. S5.** HER polarization curves of Cu and coated Cu electrodes in an H-cell.

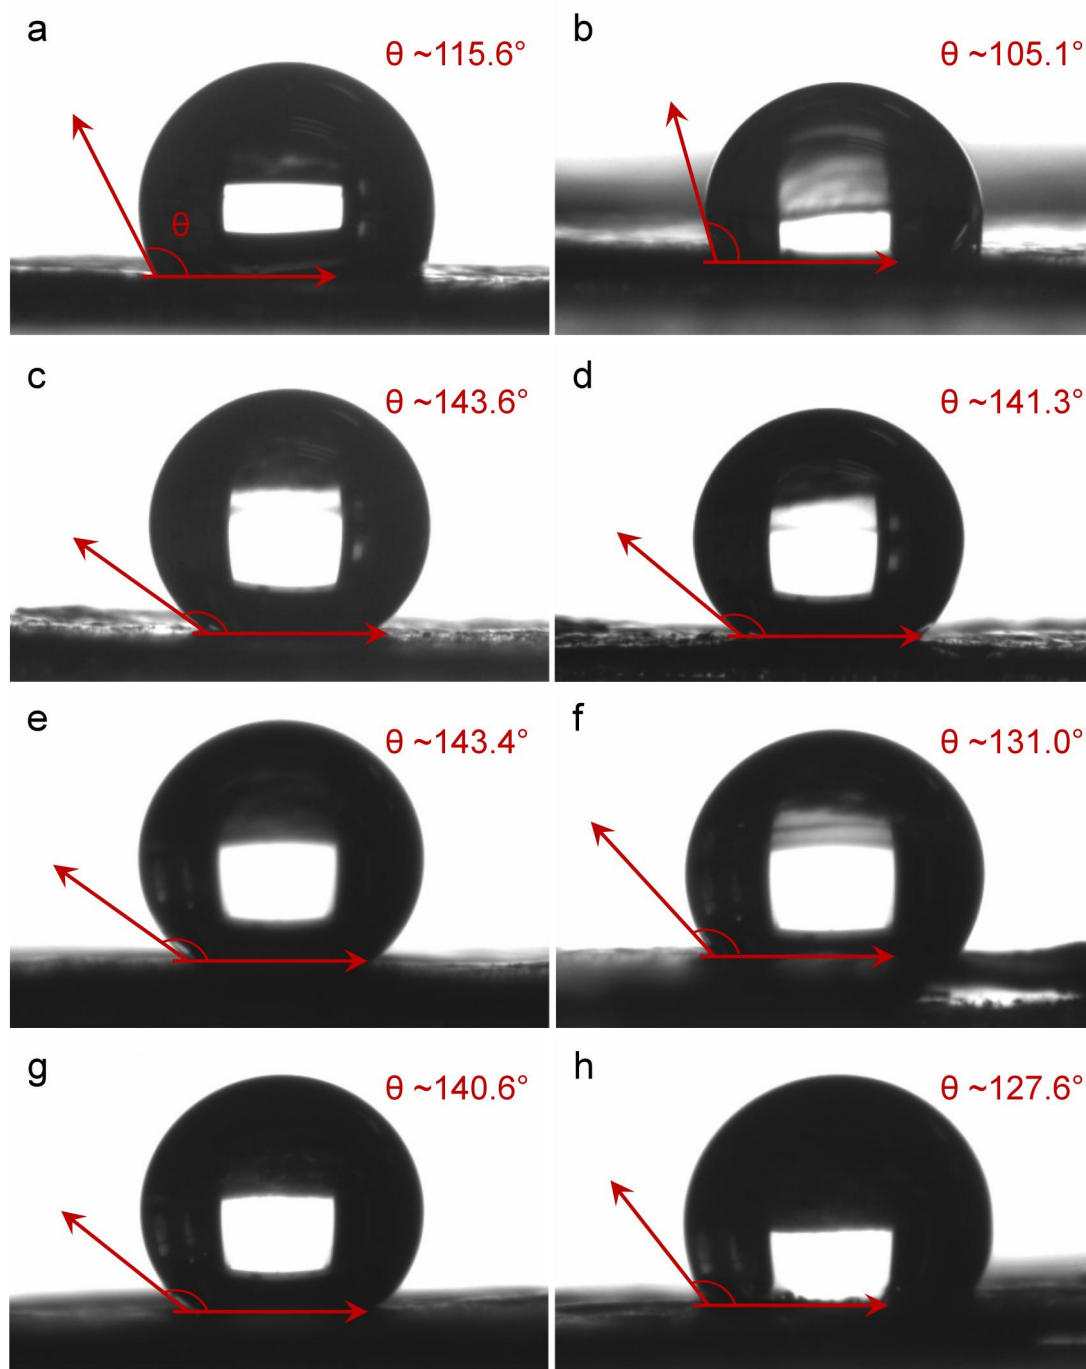

**Fig. S6.** Contact angles of (a, b) Cu, (c, d) C/CEI-Cu, (e, f) C/NI-Cu, and (g, h) C/AEI-Cu electrodes (a, c, e, g) before and (b, d, f, h) after acidic CO<sub>2</sub> electrolysis at 300 mA cm<sup>-2</sup> for 0.5 h in 0.5 M K<sub>2</sub>SO<sub>4</sub> (pH 2).

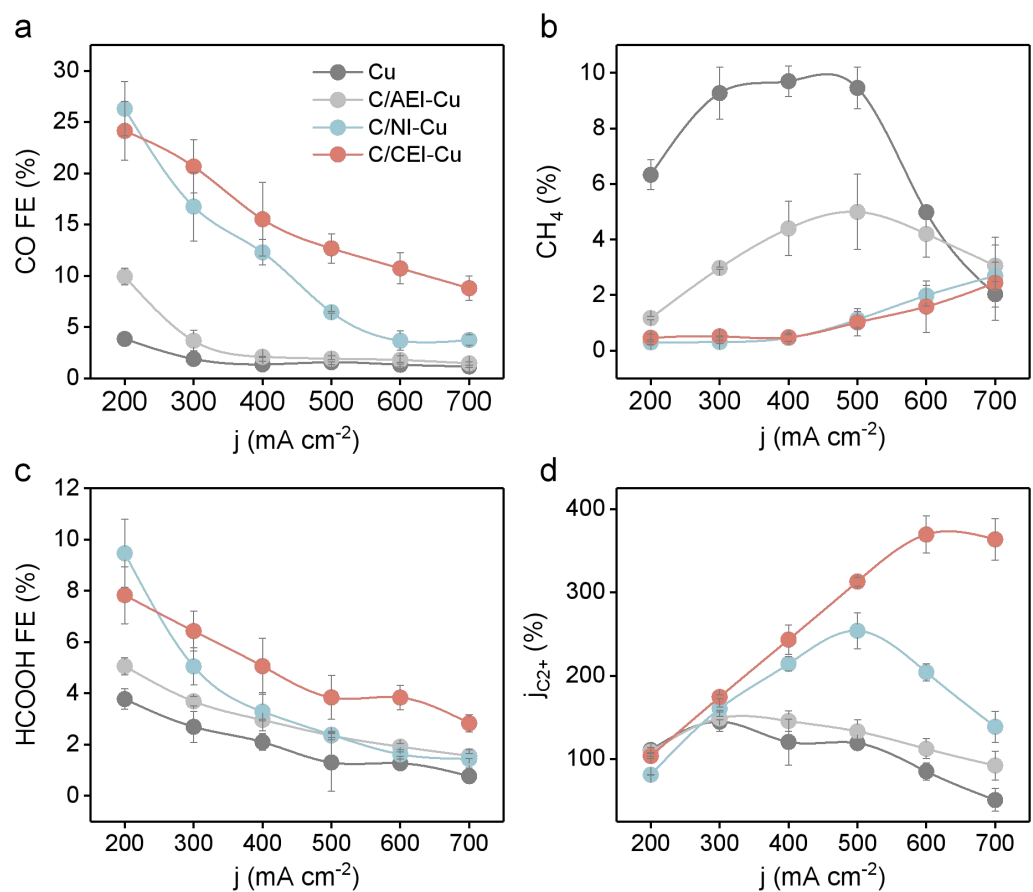

**Fig. S7.** (a-c) FEs of (a) CO, (b) CH<sub>4</sub>, (c) HCOOH, and (d) partial current density of C<sub>2</sub><sup>+</sup> products (j<sub>C2+</sub>) as a function of current density on Cu, C/AEI-Cu, C/Ni-Cu, and C/CEI-Cu electrodes in 0.5 M K<sub>2</sub>SO<sub>4</sub> (pH 2).

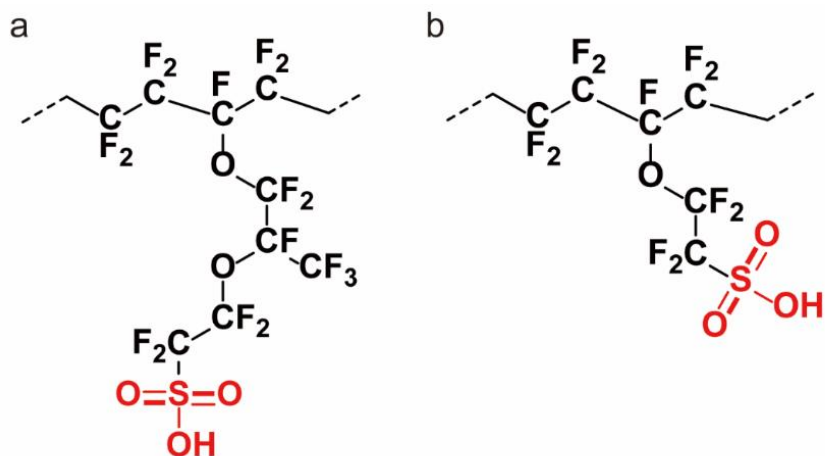

**Fig. S8.** Chemical structure of (a) Nafion 117 (equivalent weight, EW = 1100 g mol<sup>-1</sup> SO<sub>3</sub>H) and (b) Aquivion D79-25BS (EW = 790 g mol<sup>-1</sup> SO<sub>3</sub>H). The ion exchange capacity (IEC) is inversely proportional to the EW of the CEI, with a higher IEC corresponding to a lower EW.

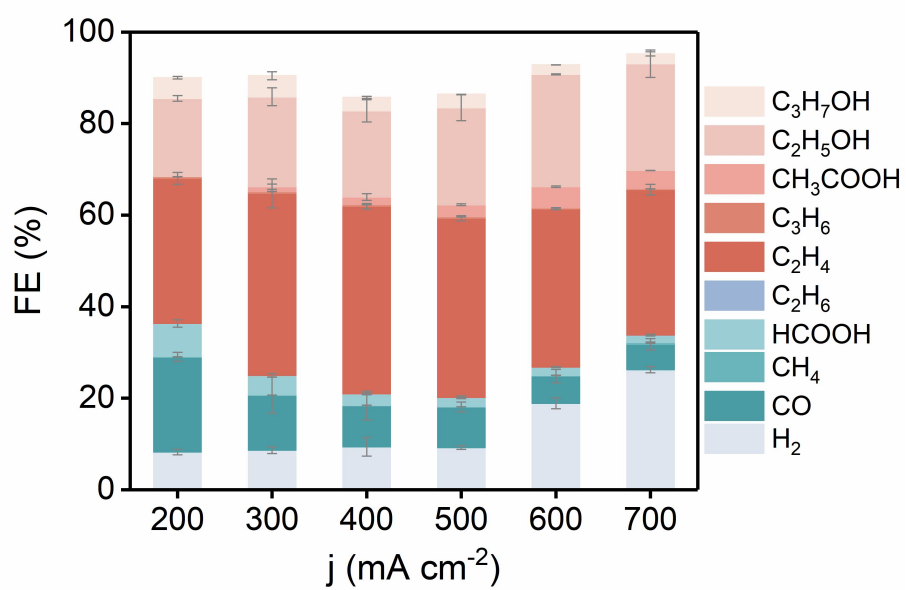

**Fig. S9.** Product distributions for acidic CO<sub>2</sub> electrolysis on the C/CEI<sub>Low</sub>-Cu electrode in 0.5 M K<sub>2</sub>SO<sub>4</sub> (pH 2).

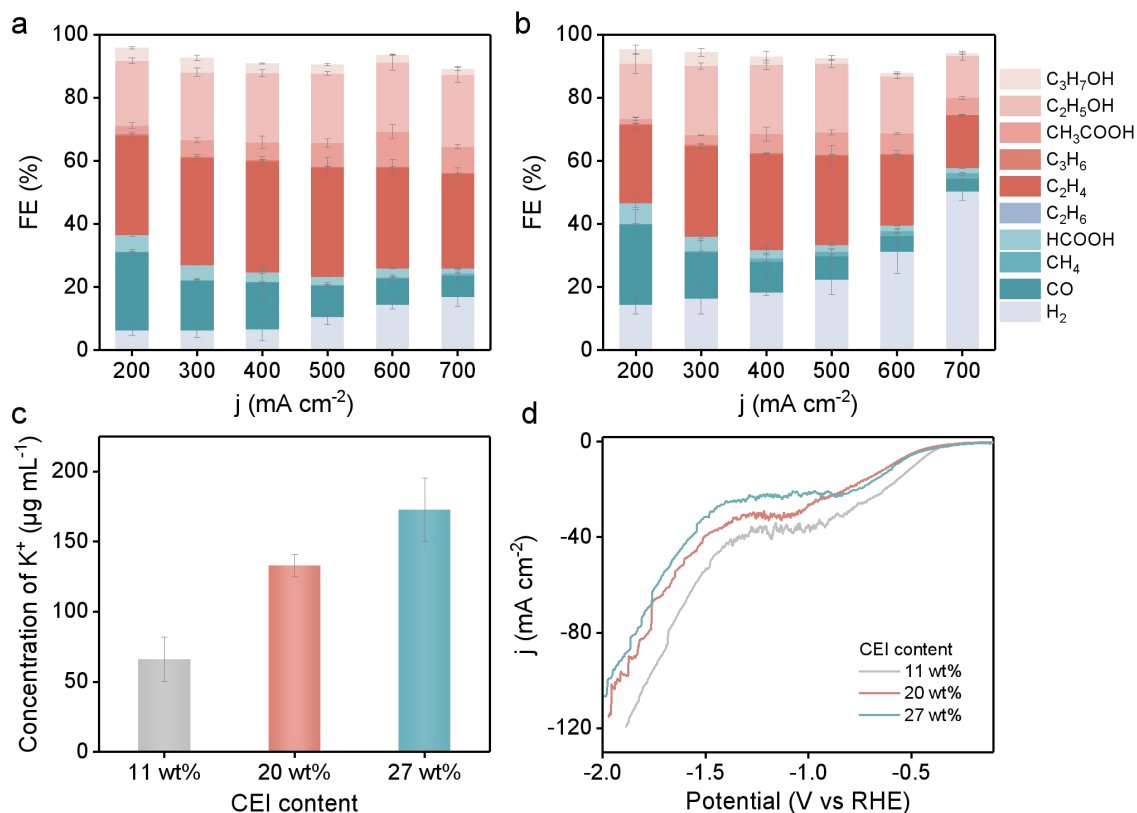

**Fig. S10.** (a-b) Product distributions for acidic CO<sub>2</sub> electrolysis on (a) C/CEI<sub>27wt%</sub>-Cu and (b) C/CEI<sub>11wt%</sub>-Cu electrodes in 0.5 M K<sub>2</sub>SO<sub>4</sub> (pH 2). (c) Adsorbed-K<sup>+</sup> concentrations on C/CEI-coated Cu electrodes with varying CEI contents. (d) HER polarization curves of C/CEI-coated Cu electrodes with varying CEI contents.

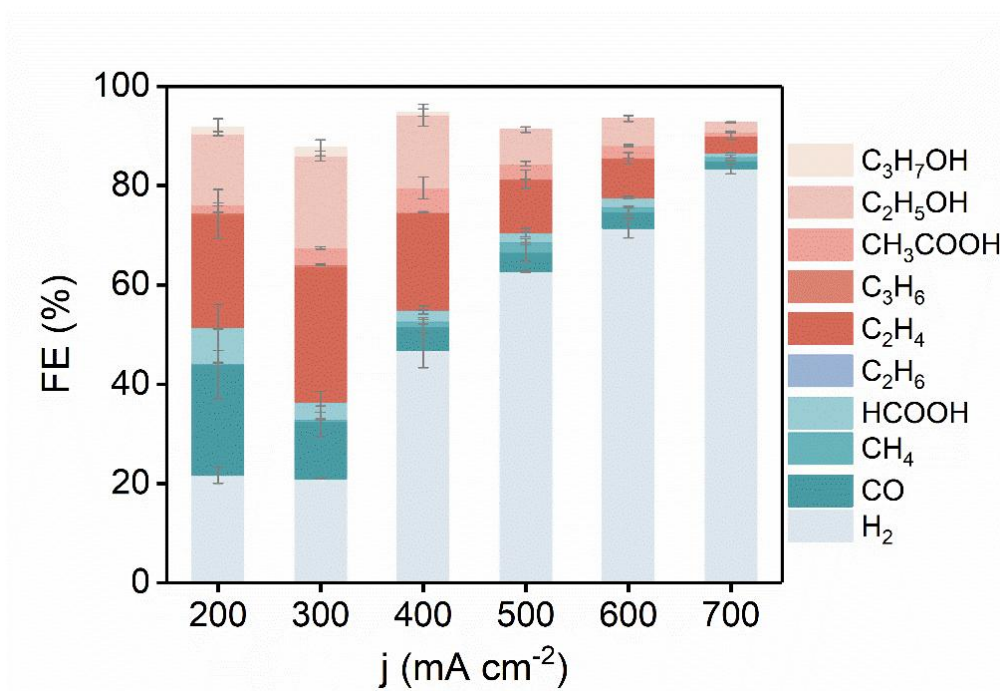

**Fig. S11.** Product distributions for acidic CO<sub>2</sub> electrolysis on the CEI-Cu electrode in 0.5 M K<sub>2</sub>SO<sub>4</sub> (pH 2).

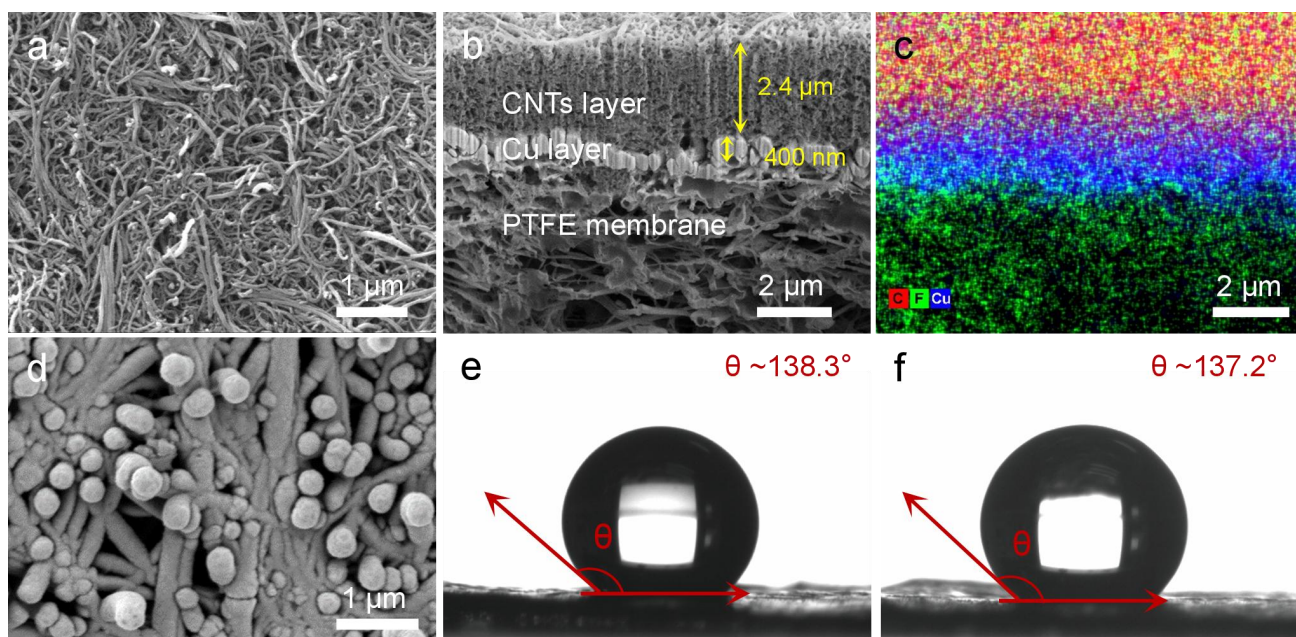

**Fig. S12.** (a) SEM image of CNTs, (b) SEM image (at 52° sample tilt), and (c) corresponding EDS elemental maps of the FIB-milled cross-section of the CNTs/CEI-Cu electrode. (d) SEM image of the underlying Cu of the CNTs/CEI-Cu electrode. Contact angles of the CNTs/CEI-Cu electrode (e) before and (f) after acidic CO<sub>2</sub> electrolysis at 300 mA cm<sup>-2</sup> for 0.5 h.

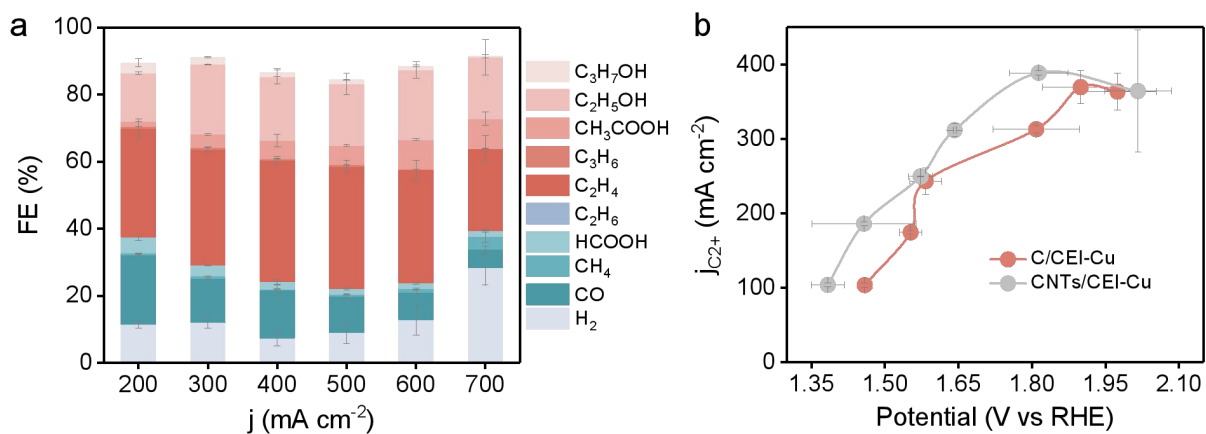

**Fig. S13.** (a) Product distributions for acidic CO<sub>2</sub> electrolysis on the CNTs/CEI-Cu electrode, and (b)  $j_{C2+}$  on C/CEI-Cu and CNTs/CEI-Cu electrodes as a function of working potential in 0.5 M K<sub>2</sub>SO<sub>4</sub> (pH 2).

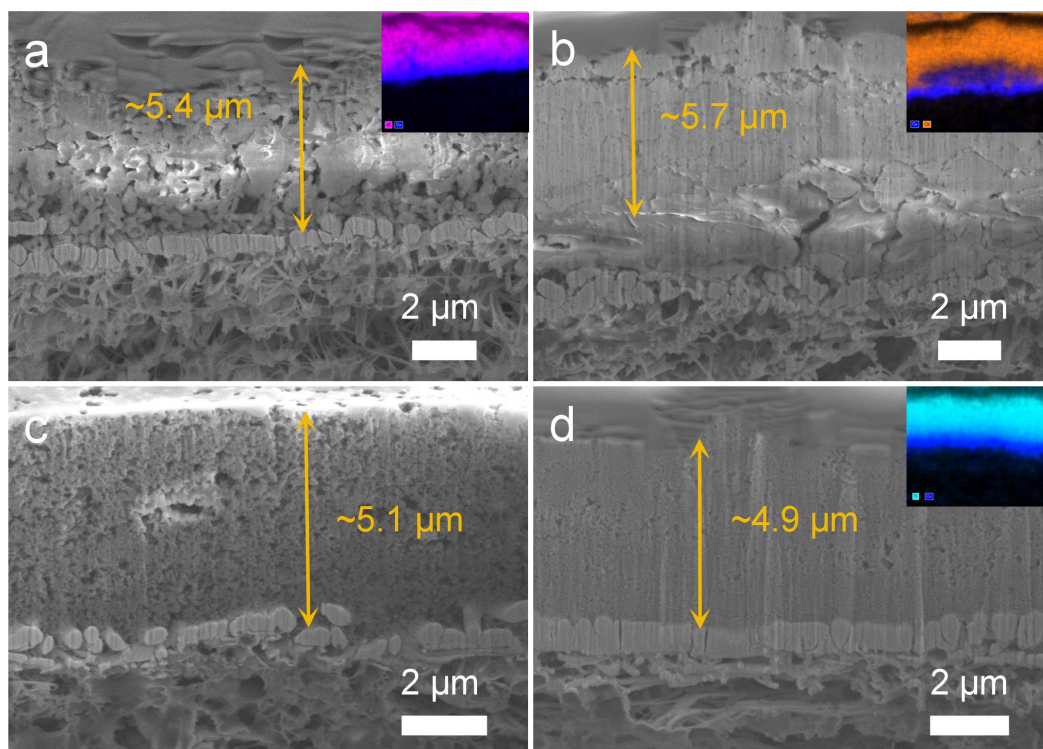

**Fig. S14.** SEM images (at 52° sample tilt) of the FIB-milled cross-section of (a) Al<sub>2</sub>O<sub>3</sub>/CEI-Cu, (b) CeO<sub>2</sub>/CEI-Cu, (c) C/CEI-Cu, and (d) TiO<sub>2</sub>/CEI-Cu electrodes. Insets show the corresponding overlaid metallic elemental maps.

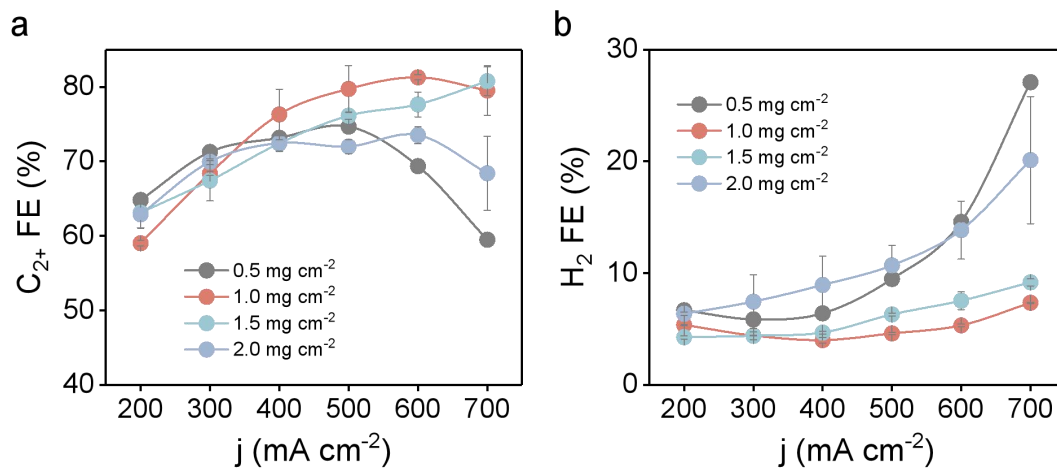

**Fig. S15.** FEs of (a) C<sub>2+</sub> and (b) H<sub>2</sub> as a function of current density on Al<sub>2</sub>O<sub>3</sub>/CEI<sub>Low</sub>-coated Cu electrodes with varying coating loadings in 0.5 M K<sub>2</sub>SO<sub>4</sub> (pH 2). The electrode with a coating loading of 1.0 mg cm<sup>-2</sup> referred to the electrode with a ~5 μm-thick Al<sub>2</sub>O<sub>3</sub>/CEI<sub>Low</sub> coating. The thickness of the coating layer could influence the capacity for ion-flux regulation. A thinner coating layer failed to provide sufficient ion-flux regulation, resulting in poor CO<sub>2</sub>-to-C<sub>2+</sub> conversion. Increasing the coating layer thickness, however, did not lead to continuous performance improvement, as an excessively thick coating layer would introduce additional mass transport resistance for K<sup>+</sup> and CO<sub>2</sub>.

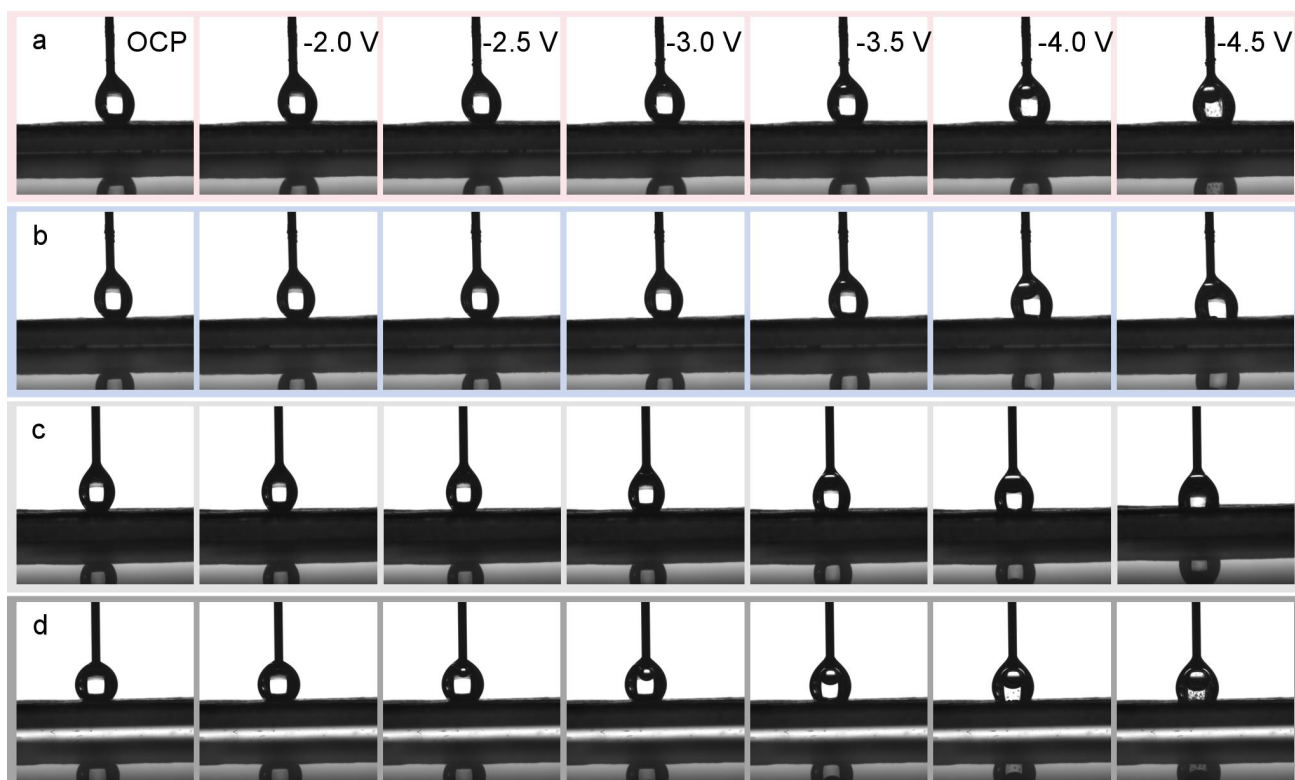

**Fig. S16.** *In situ* contact angle measurements of the electrolyte (0.5 M K<sub>2</sub>SO<sub>4</sub>, pH 2) on (a) Al<sub>2</sub>O<sub>3</sub>/CEI-Cu, (b) CeO<sub>2</sub>/CEI-Cu, (c) C/CEI-Cu, and (d) TiO<sub>2</sub>/CEI-Cu electrodes under OCP and applied voltages (between the electrode and syringe needle).

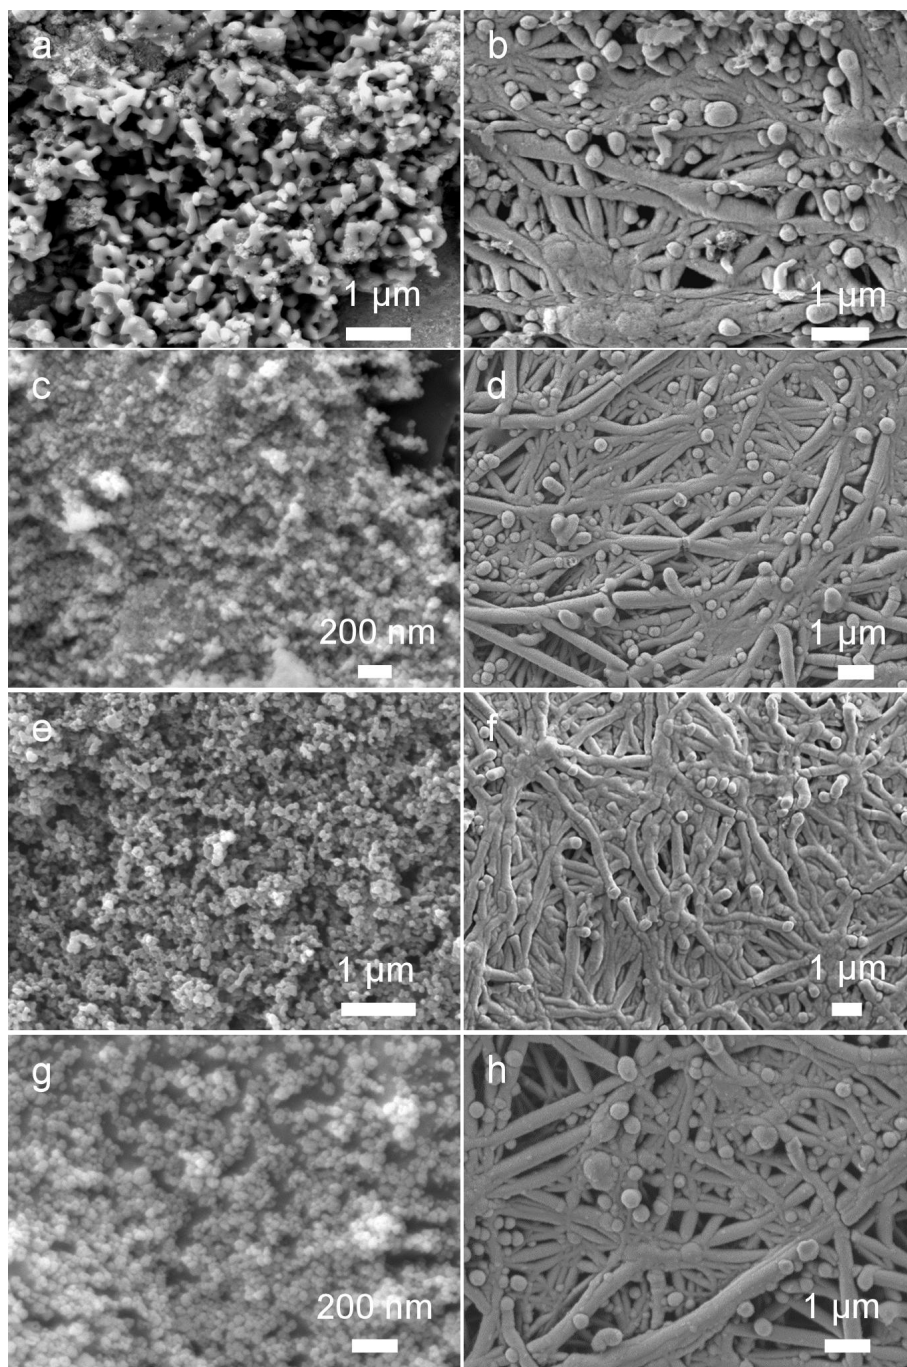

**Fig. S17.** SEM images of the fillers: (a) Al<sub>2</sub>O<sub>3</sub>, (c) CeO<sub>2</sub>, (e) carbon, and (g) TiO<sub>2</sub>. SEM images of the underlying Cu of the corresponding electrodes: (b) Al<sub>2</sub>O<sub>3</sub>/CEI-Cu, (d) CeO<sub>2</sub>/CEI-Cu, (f) C/CEI-Cu, and (h) TiO<sub>2</sub>/CEI-Cu.

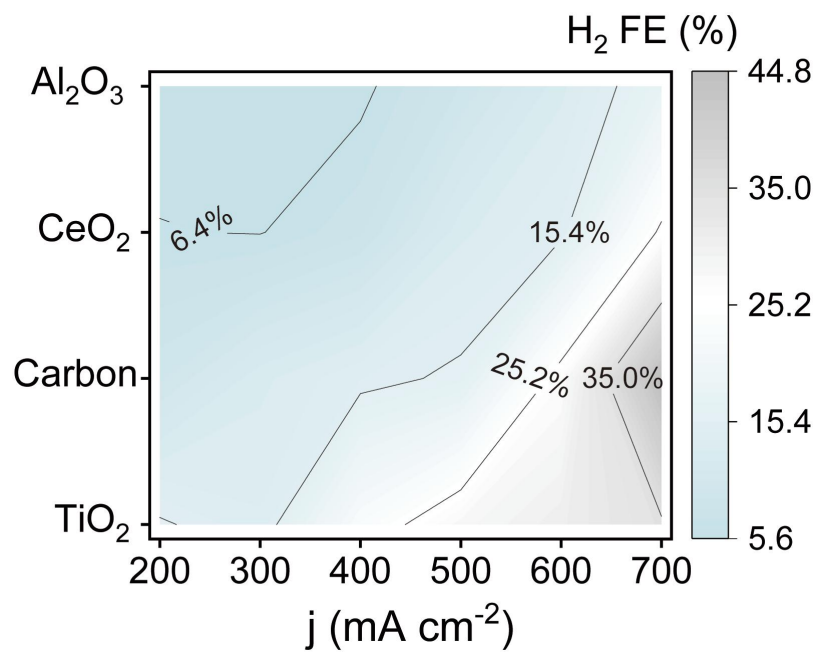

**Fig. S18.** Contour plot of H<sub>2</sub> FE as a function of current density and inorganic filler type in 0.5 M K<sub>2</sub>SO<sub>4</sub> (pH 2).

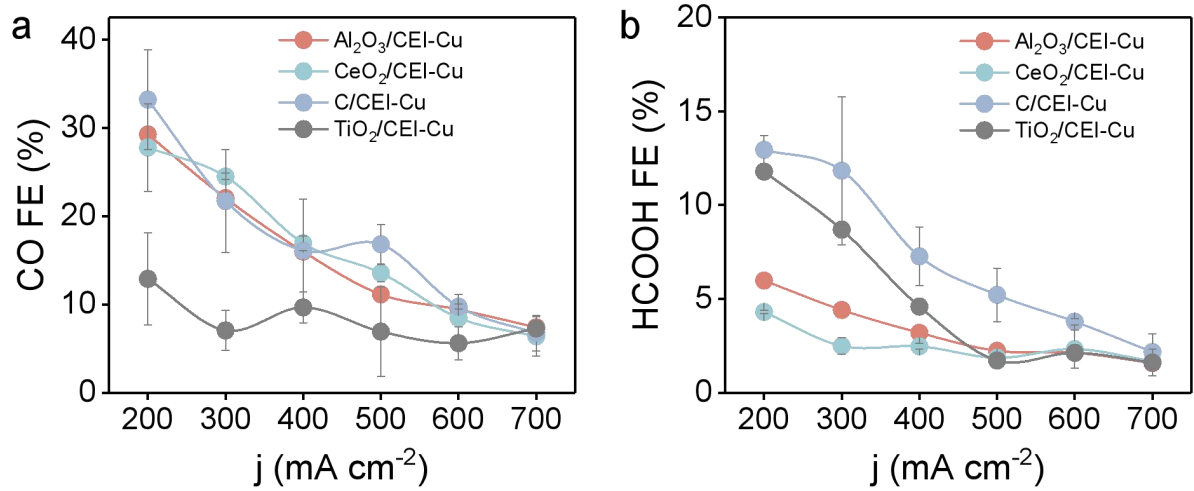

**Fig. S19.** FEs of (a) CO and (b) HCOOH as a function of current density on various electrodes in 0.5 M K<sub>2</sub>SO<sub>4</sub> (pH 2).

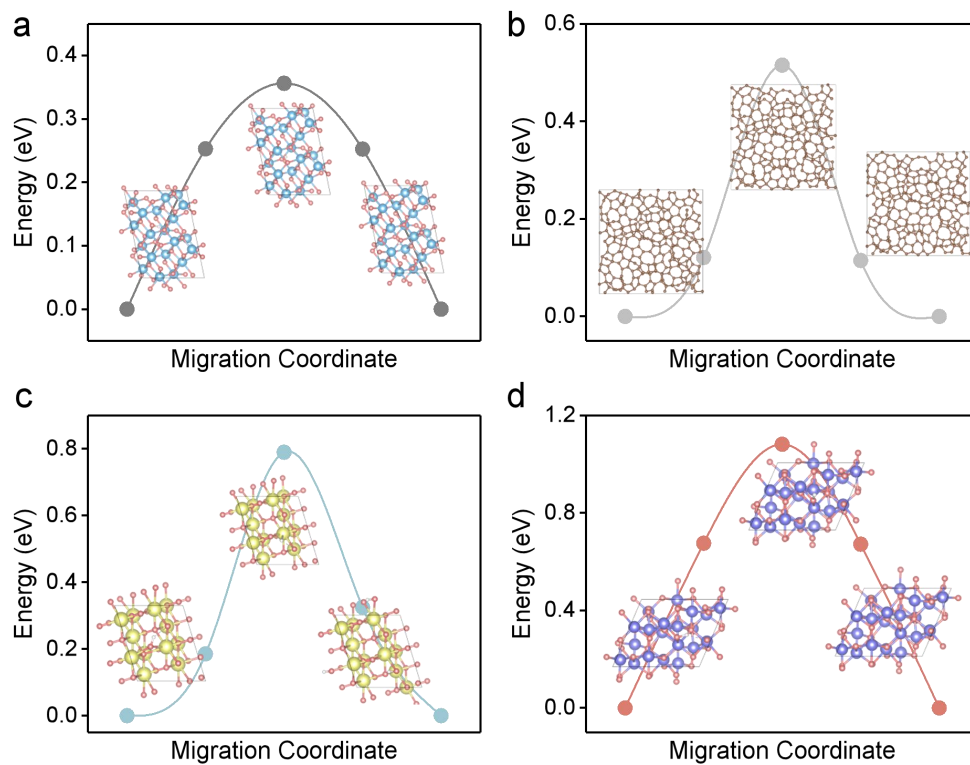

**Fig. S20.** Computed H-migration profiles on (a) TiO<sub>2</sub>, (b) Carbon, (c) CeO<sub>2</sub>, and (d) Al<sub>2</sub>O<sub>3</sub> surfaces.

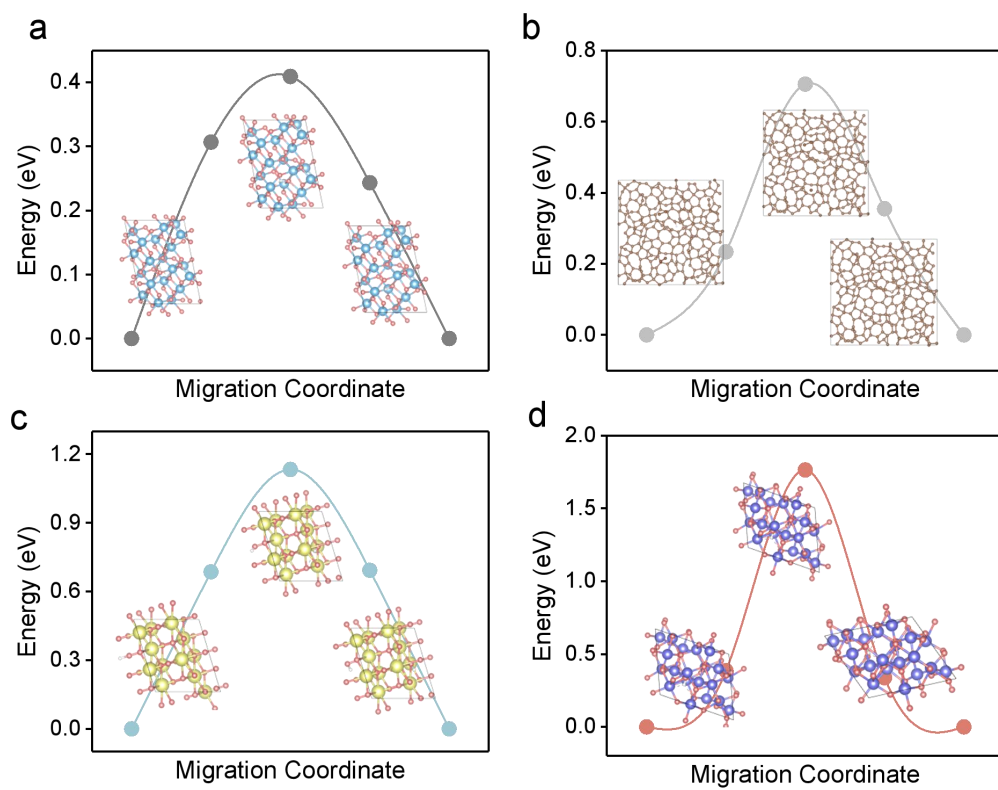

**Fig. S21.** Computed H-migration profiles within the bulk of (a) TiO<sub>2</sub>, (b) Carbon, (c) CeO<sub>2</sub>, and (d) Al<sub>2</sub>O<sub>3</sub>.

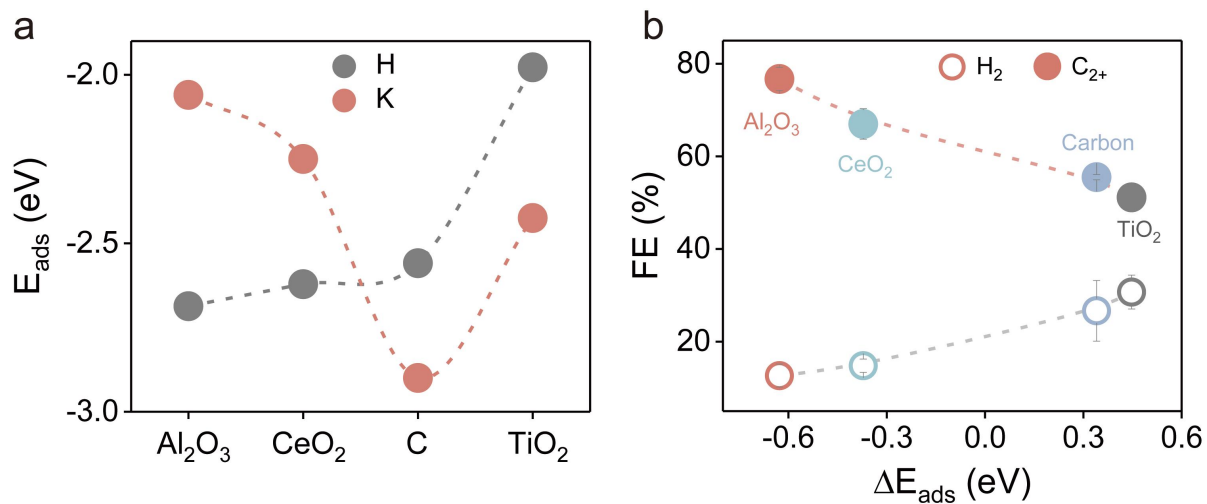

**Fig. S22.** (a) Computed adsorption energies of H and K on the surface of various inorganic fillers. (b)  $\text{H}_2$  and  $\text{C}_{2+}$  FEs at  $600 \text{ mA cm}^{-2}$  as a function of  $\Delta E_{\text{ads}}$  ( $E_{\text{ads, H}} - E_{\text{ads, K}}$ ) for various inorganic fillers.

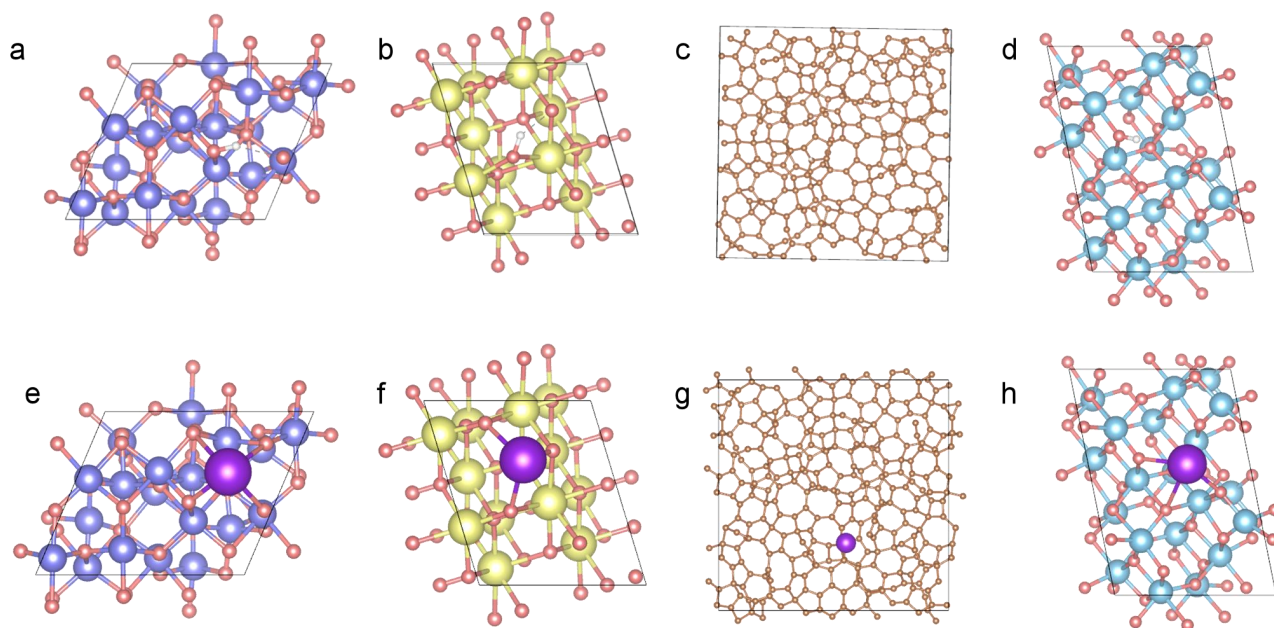

**Fig. S23.** Optimized configurations with (a-d) adsorbed H and (e-h) adsorbed K on (a, e) Al<sub>2</sub>O<sub>3</sub>, (b, f) CeO<sub>2</sub>, (c, g) carbon, (d, h) TiO<sub>2</sub> surface.

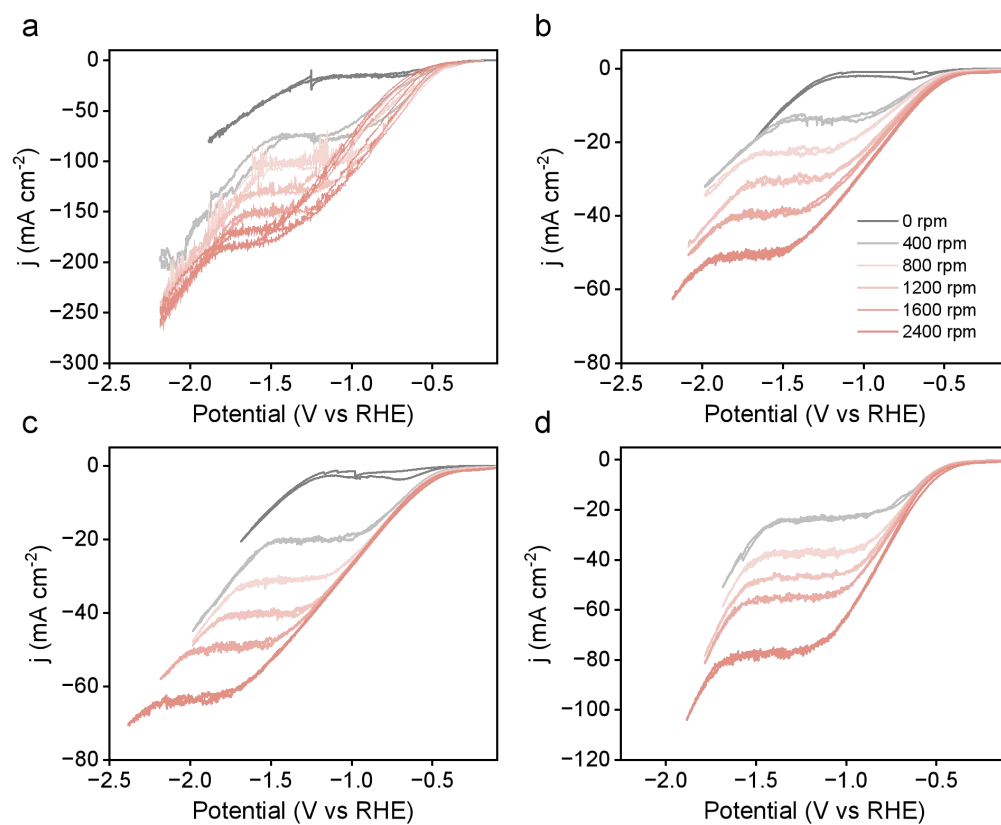

**Fig. S24.** CV curves of (a) Cu RDE, (b)  $\text{Al}_2\text{O}_3/\text{CEI-Cu}$  RDE, (c)  $\text{CeO}_2/\text{CEI-Cu}$  RDE, and (d)  $\text{TiO}_2/\text{CEI-Cu}$  RDE in Ar-saturated 0.5 M  $\text{K}_2\text{SO}_4$  (pH 2) at various rotation rates. Scan rate:  $50 \text{ mV s}^{-1}$ .

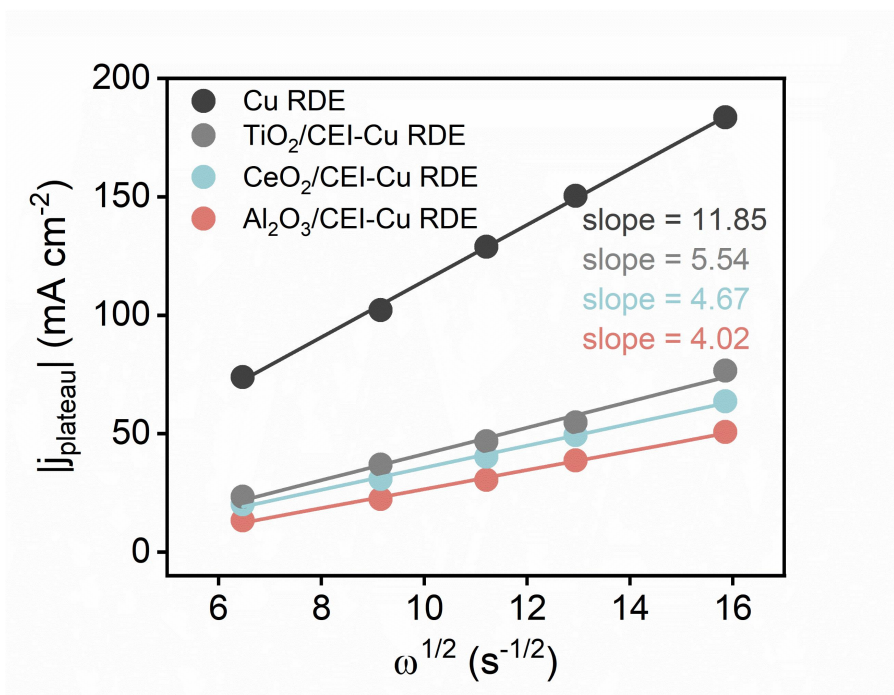

**Fig. S25.** Linear fitting of  $|j_{\text{plateau}}|$  vs  $\omega^{1/2}$  for Cu and coated Cu RDE.

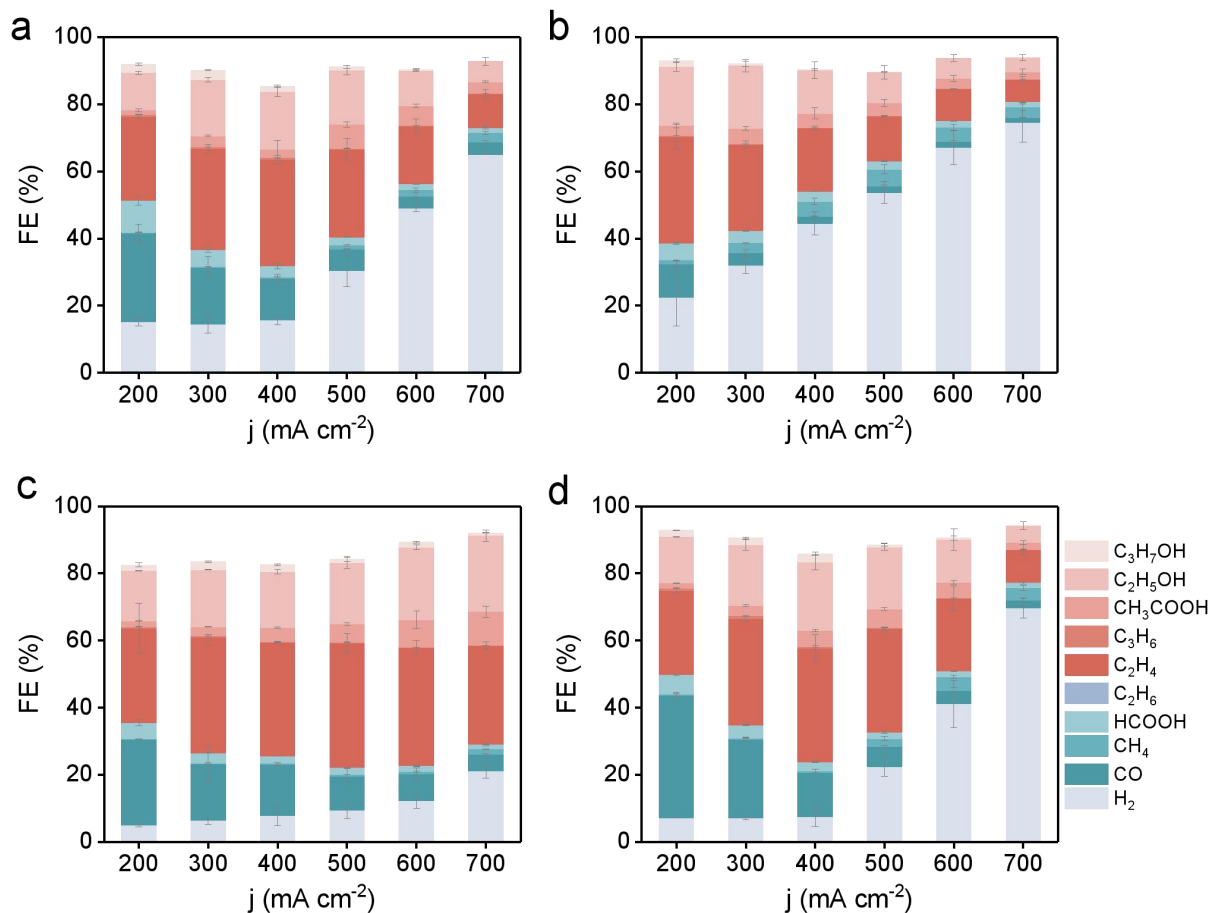

**Fig. S26.** Product distributions for acidic  $\text{CO}_2$  electrolysis on (a) C/Ni-Cu, (b) C/AEI-Cu, (c)  $\text{Al}_2\text{O}_3/\text{Ni-Cu}$ , and (d)  $\text{Al}_2\text{O}_3/\text{AEI-Cu}$  electrodes in  $0.5 \text{ M K}_2\text{SO}_4$  (pH 2).

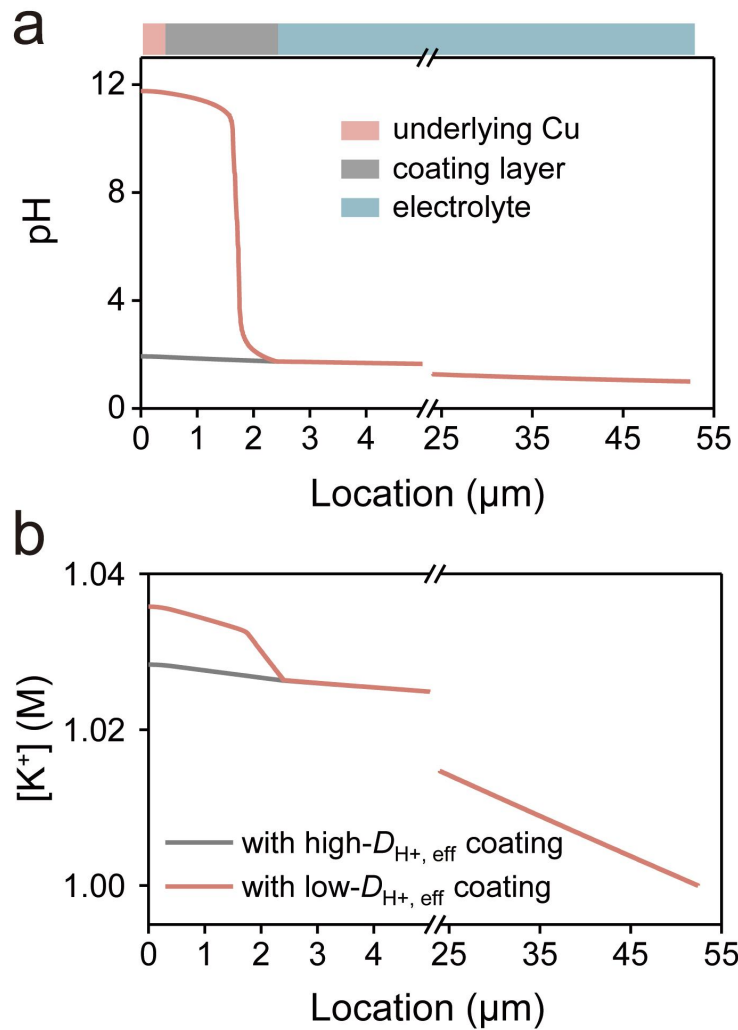

**Fig. S27.** Simulated (a) pH profiles and (b)  $K^+$  concentration ( $[K^+]$ ) profiles from the electrode surface to the bulk electrolyte for coated Cu electrodes with varying proton diffusion coefficients ( $D_{H^+, \text{eff}}$ ) of the coating at a current density of  $150 \text{ mA cm}^{-2}$ .

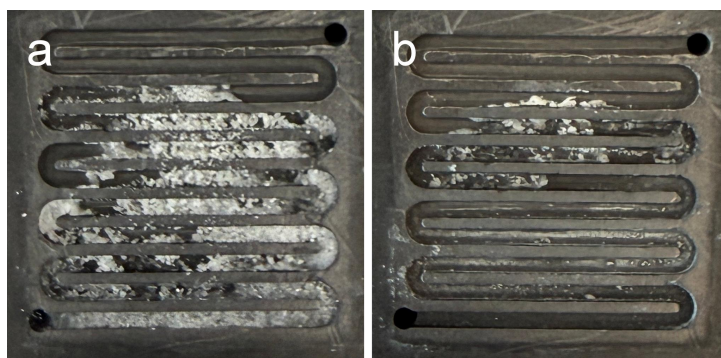

**Fig. S28.** Optical photographs of the gas channel after the durability test in (a) 0.5 M  $K_2SO_4$  for 70 h and (b) 0.1 M  $K_2SO_4$  for 200 h.

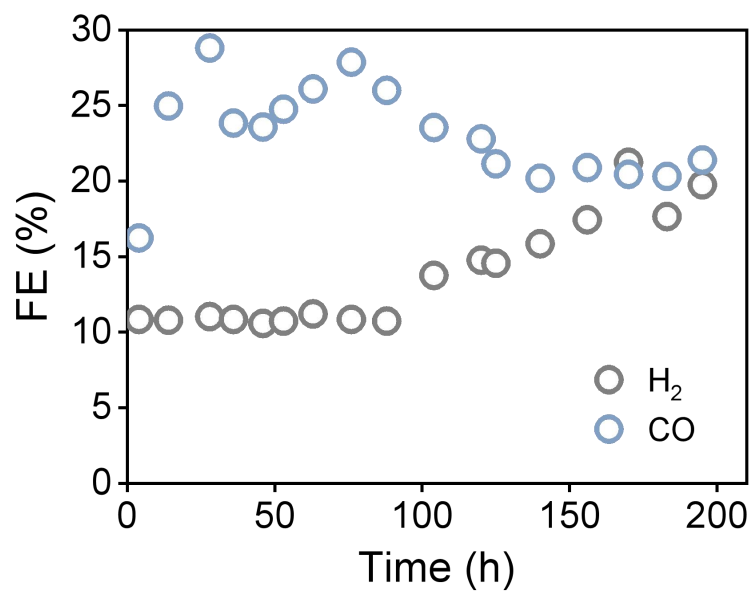

**Fig. S29.** Time-dependent FEs of CO and H<sub>2</sub> during long-term testing in 0.1 M K<sub>2</sub>SO<sub>4</sub> (pH 2).

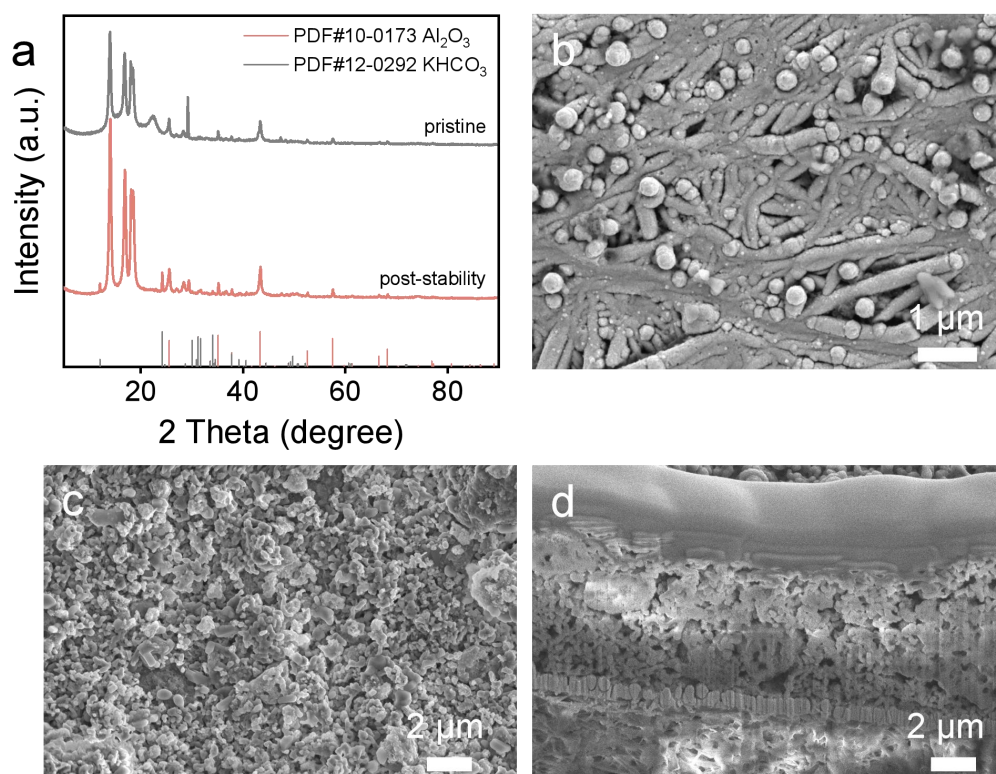

**Fig. S30.** (a) XRD patterns of the Al<sub>2</sub>O<sub>3</sub>/CEI<sub>Low</sub>-Cu electrode before and after a 200-h durability test at 200 mA cm<sup>-2</sup> in 0.1 M K<sub>2</sub>SO<sub>4</sub> (pH 2). (b, c) SEM images of (b) the underlying Cu of the electrode and (c) the electrode surface after the durability test. (d) SEM image (at 52° sample tilt) of the FIB-milled cross-section of the electrode after the durability test.

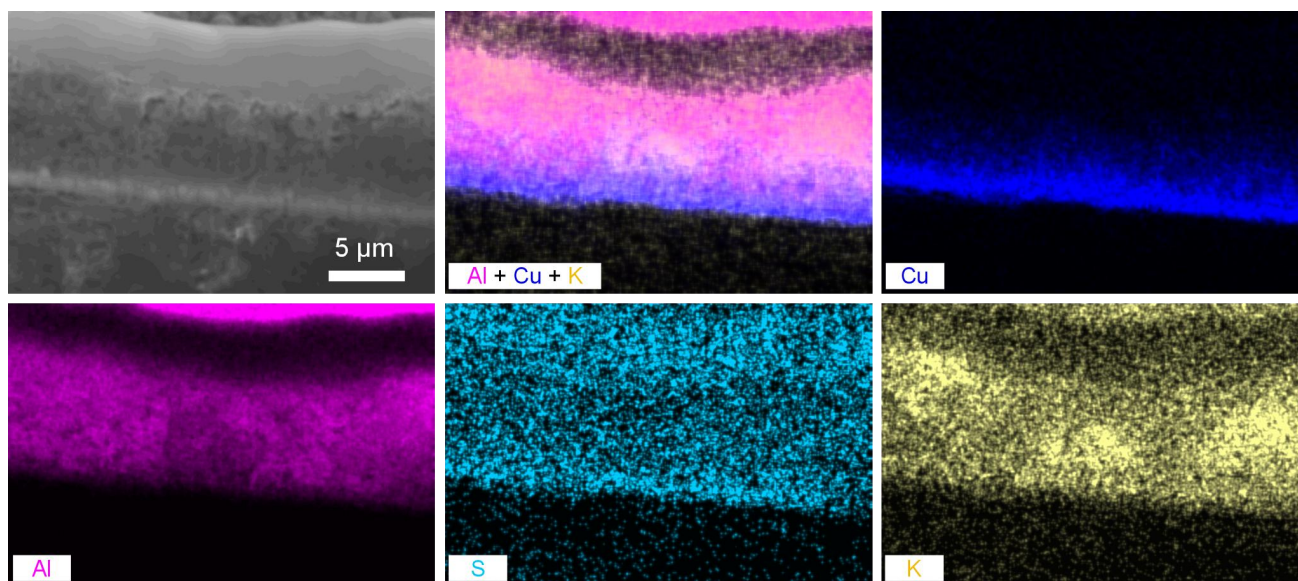

**Fig. S31.** SEM image (at 52° sample tilt) and corresponding EDS elemental maps of the FIB-milled cross-section of the  $\text{Al}_2\text{O}_3/\text{CEI}_{\text{Low}}\text{-Cu}$  electrode after a 200-h durability test.

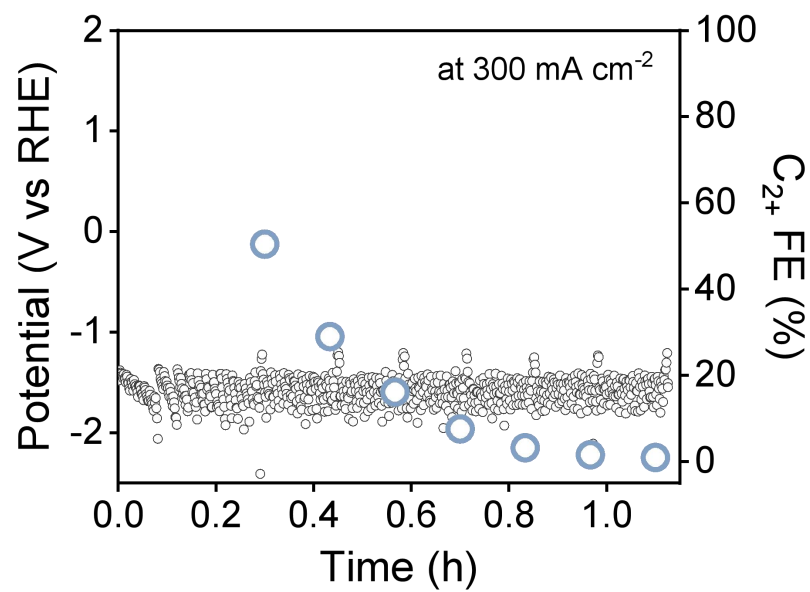

**Fig. S32.** Durability test of the Cu electrode at 300 mA cm<sup>-2</sup> in 0.5 M K<sub>2</sub>SO<sub>4</sub> (pH 2).

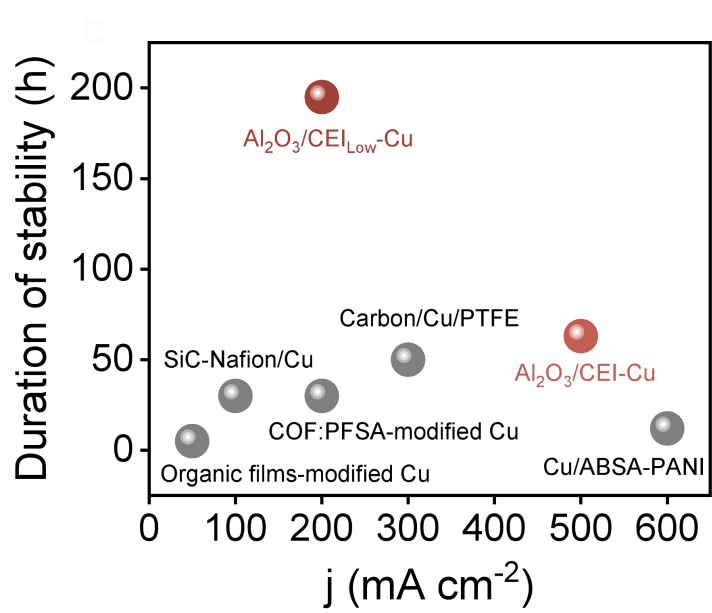

**Fig. S33.** Comparison of the duration of stability with previously reported electrode coating formulation.

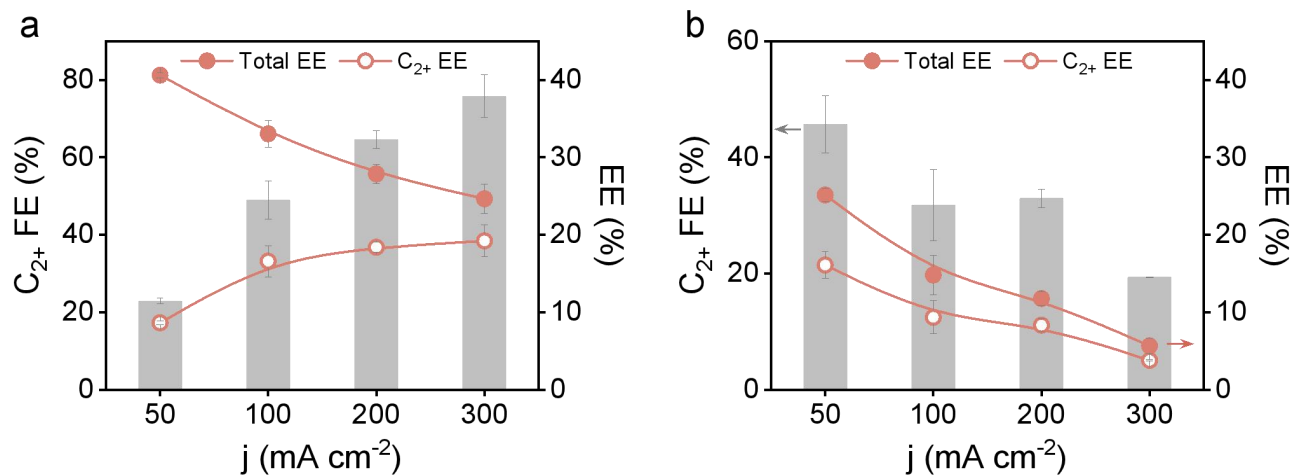

**Fig. S34.** EEs for total  $\text{CO}_2$  electrolysis products and  $\text{C}_{2+}$  products, together with  $\text{C}_{2+}$  FE, as a function of current density on (a)  $\text{Al}_2\text{O}_3/\text{CEI-Cu}$  and (b)  $\text{Cu}$  electrodes in  $0.5 \text{ M K}_2\text{SO}_4$  (pH 2).

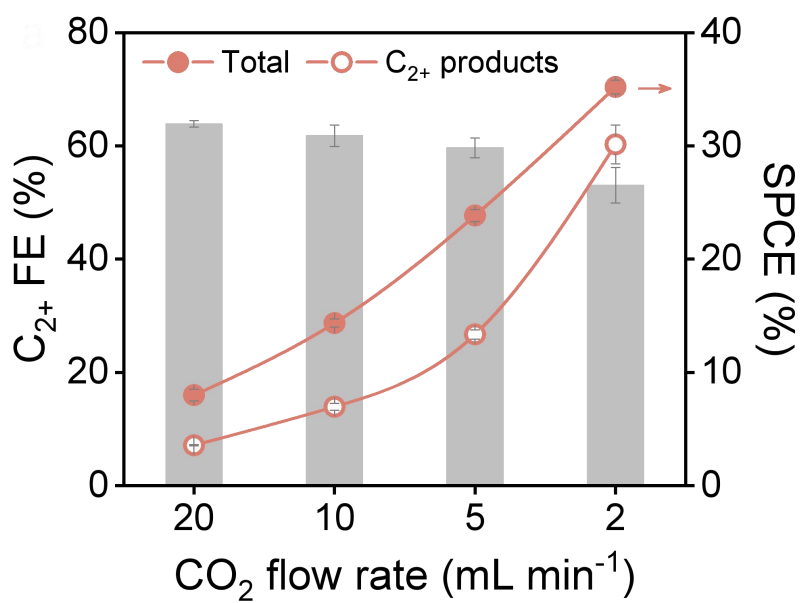

**Fig. S35.** FE and SPCE for C<sub>2+</sub> products, as well as SPCE for total CO<sub>2</sub> electrolysis products, as a function of CO<sub>2</sub> flow rate at 200 mA cm<sup>-2</sup>.

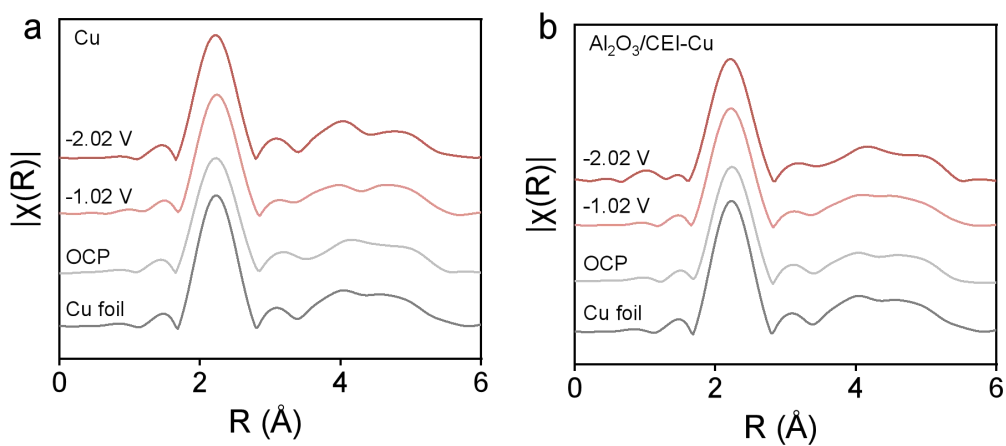

**Fig. S36.** *In situ* Cu K-edge Fourier-transformed extended X-ray absorption fine structure (EXAFS) spectra of (a) Cu and (b)  $\text{Al}_2\text{O}_3/\text{CEI-Cu}$  electrodes at OCP, -1.02 and -2.02 V vs Ag/AgCl in  $\text{CO}_2$ -saturated 0.5 M  $\text{K}_2\text{SO}_4$  (pH 2), with Cu foil as a reference.

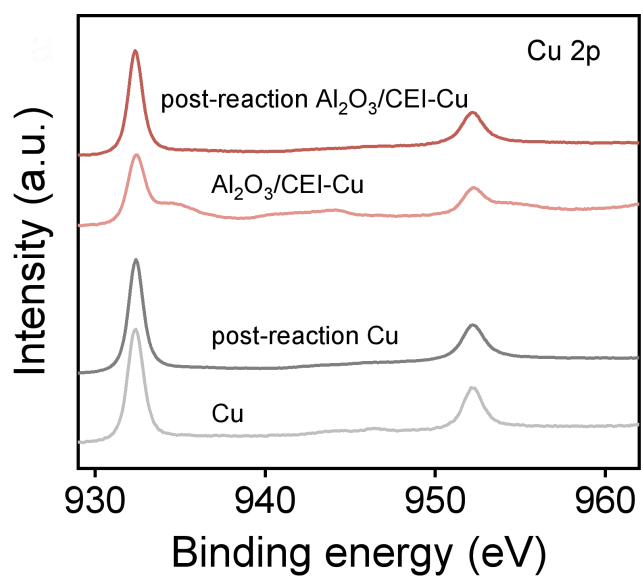

**Fig. S37.** Cu 2p XPS spectra of Cu and Al<sub>2</sub>O<sub>3</sub>/CEI-Cu electrodes, measured quasi-*in situ* before and after 30 min of CO<sub>2</sub> electrolysis at 400 mA cm<sup>-2</sup> in 0.5 M K<sub>2</sub>SO<sub>4</sub> (pH 2).

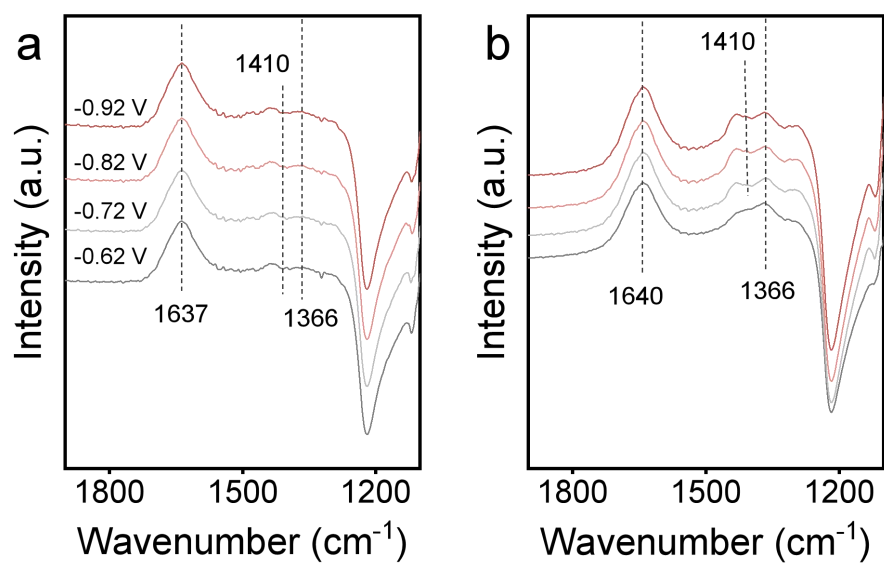

**Fig. S38.** *In situ* ATR-SEIRAS spectra of (a) Cu and (b) Al<sub>2</sub>O<sub>3</sub>/CEI-Cu electrodes in the range of 1900–1100 cm<sup>-1</sup> at applied potentials.

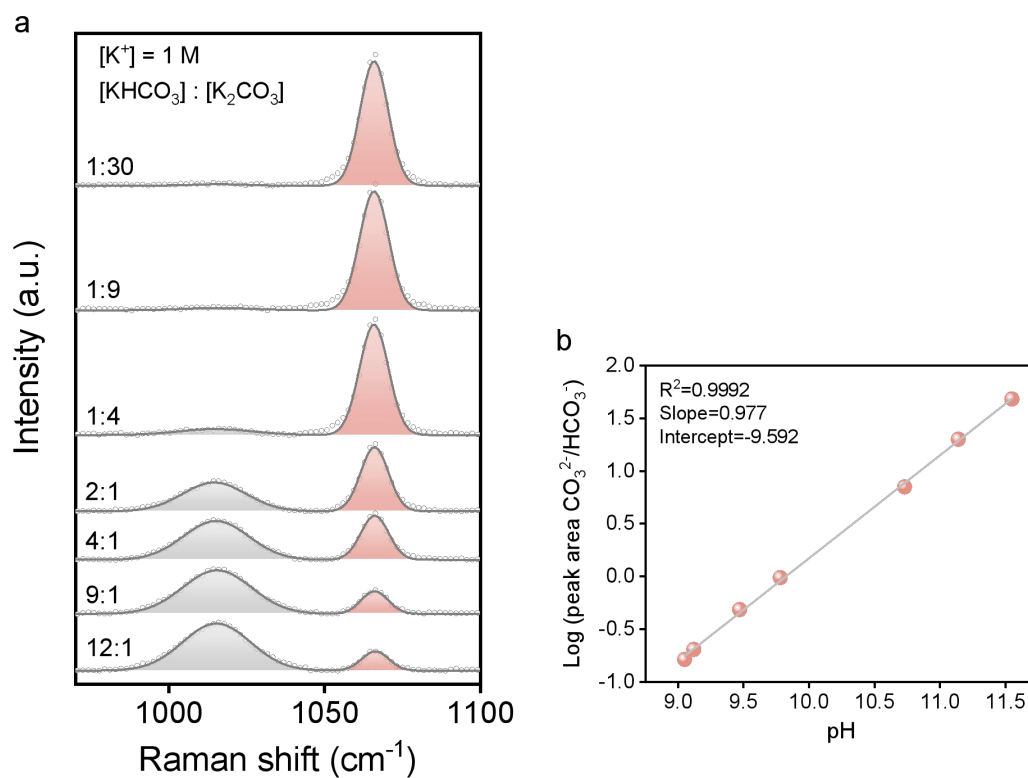

**Fig. 39.** (a) Raman spectra of calibration solutions with different pHs. All solutions contained 1 M K<sup>+</sup> with varying CO<sub>3</sub><sup>2-</sup>/HCO<sub>3</sub><sup>-</sup> molar ratio. (b) Calibration curve for local pH utilizing the logarithm of the Raman peak area ratio of CO<sub>3</sub><sup>2-</sup> to HCO<sub>3</sub><sup>-</sup>.

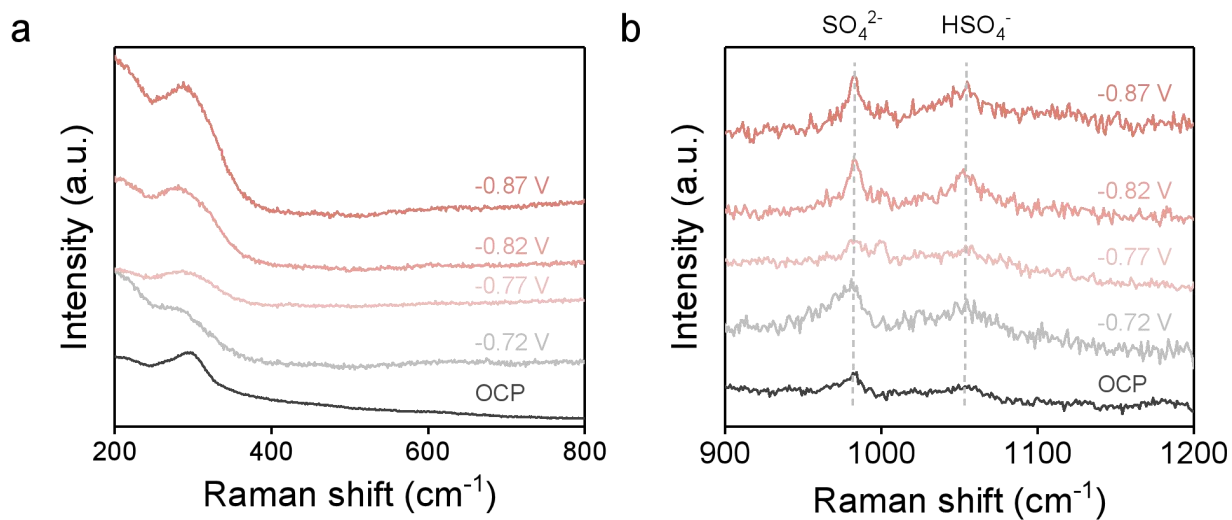

**Fig. S40.** *In situ* Raman spectra of the  $\text{Al}_2\text{O}_3/\text{CEI-Cu}$  electrode in the ranges of (a) 200–800  $\text{cm}^{-1}$  and (b) 900–1200  $\text{cm}^{-1}$  at OCP and applied potentials under an Ar atmosphere.

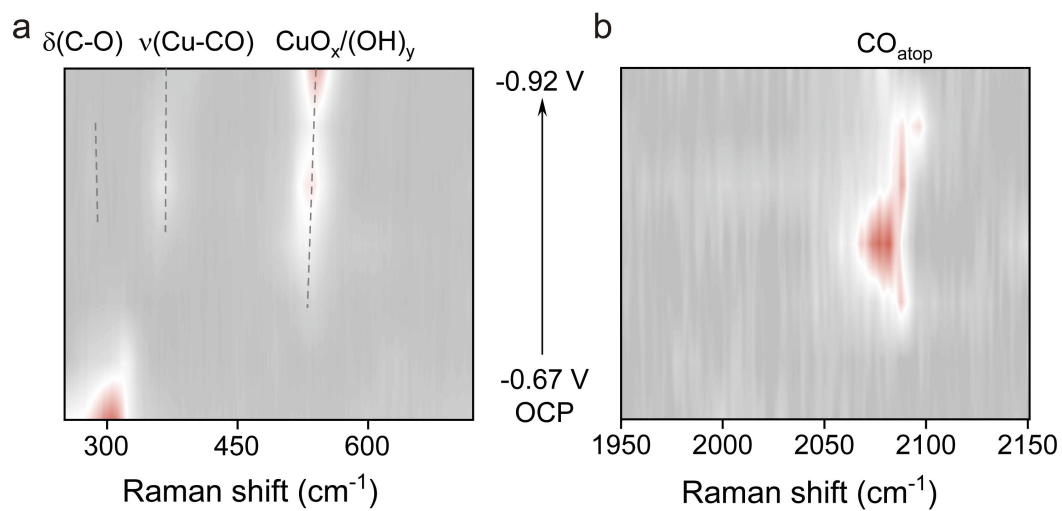

**Fig. S41.** *In situ* Raman spectra of the  $\text{Al}_2\text{O}_3/\text{CEI-Cu}$  electrode in the ranges of (a) 200–800  $\text{cm}^{-1}$  and (b) 1950–2150  $\text{cm}^{-1}$  at OCP and applied potentials.

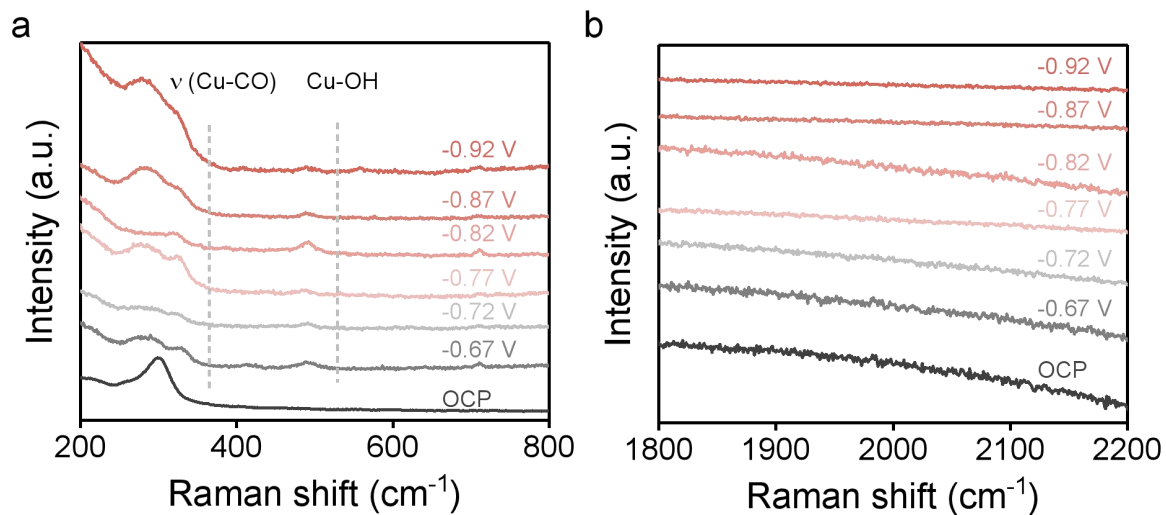

**Fig. S42.** *In situ* Raman spectra of the Cu electrode in the ranges of (a) 200–800  $\text{cm}^{-1}$  and (b) 1800–2200  $\text{cm}^{-1}$  at OCP and applied potentials.

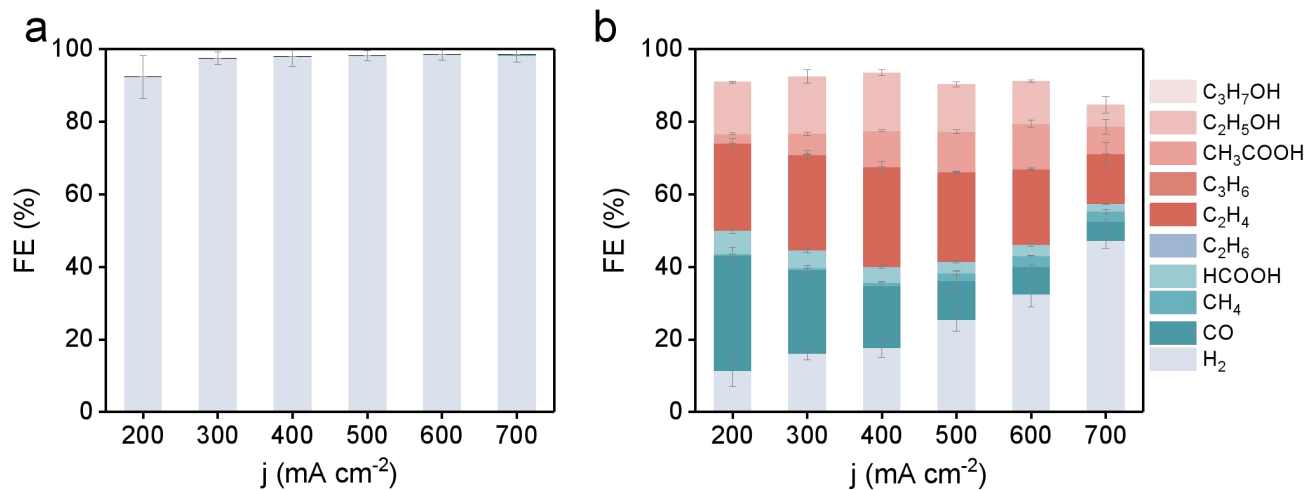

**Fig. S43.** Product distributions for acidic CO<sub>2</sub> electrolysis on (a) Cu and (b) Al<sub>2</sub>O<sub>3</sub>/CEI-Cu electrodes in 0.5 M K<sub>2</sub>SO<sub>4</sub> (pH 1).

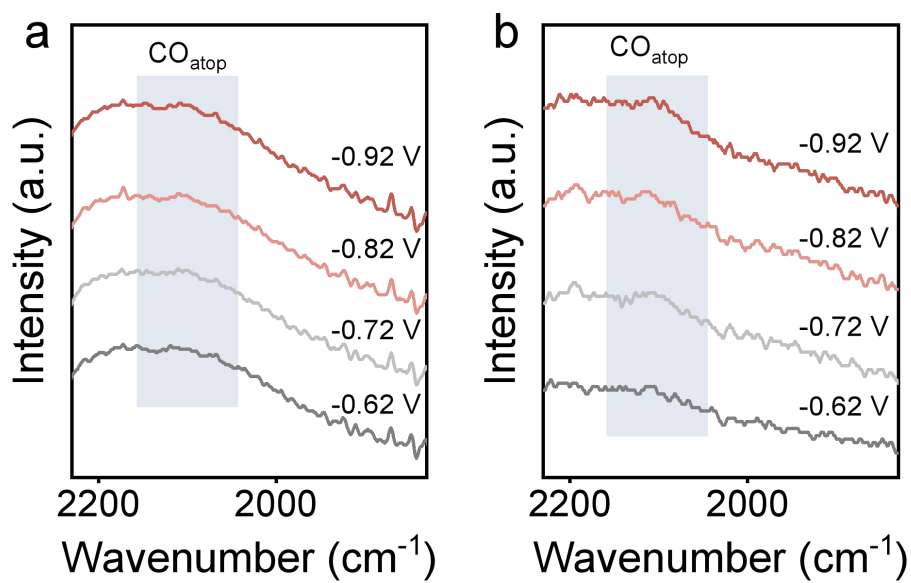

**Fig. S44.** *In situ* ATR-SEIRAS spectra of (a) Cu and (b) Al<sub>2</sub>O<sub>3</sub>/CEI-Cu electrodes in the range of 2230–1830 cm<sup>-1</sup> at applied potentials.

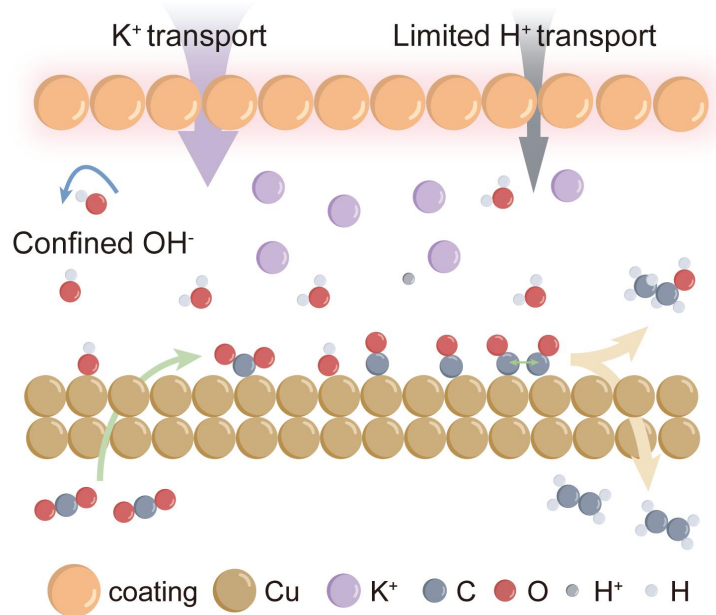

**Fig. S45.** Schematic illustration of ion-flux regulation and the resulting interfacial microenvironment on the coated Cu electrode.

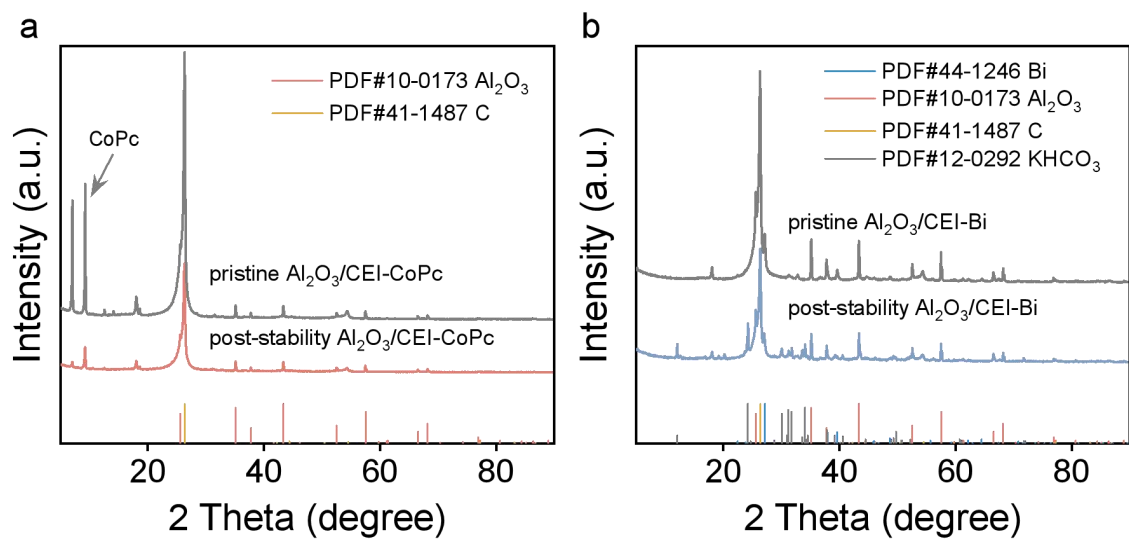

**Fig. S46.** XRD patterns of (a) Al<sub>2</sub>O<sub>3</sub>/CEI-CoPc and (b) Al<sub>2</sub>O<sub>3</sub>/CEI-Bi electrodes before and after the durability test.

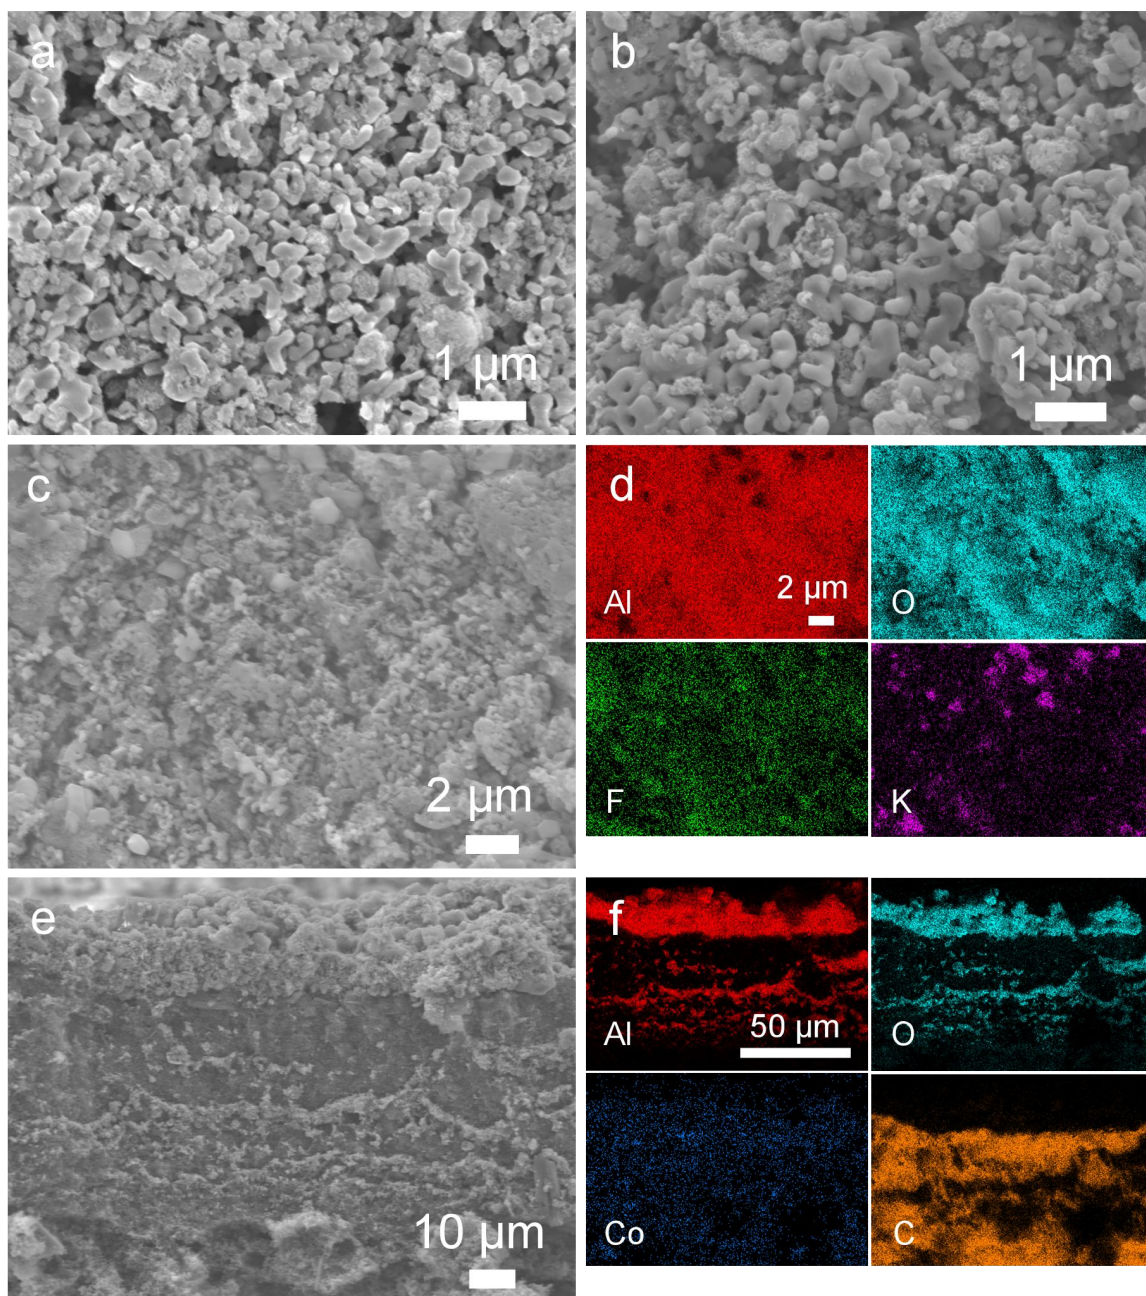

**Fig. S47.** SEM images of the  $\text{Al}_2\text{O}_3/\text{CEI-CoPc}$  electrode (a) before and (b) after the durability test. SEM images and corresponding EDS elemental maps of the  $\text{Al}_2\text{O}_3/\text{CEI-CoPc}$  electrode after the durability test: (c, d) surface view and (e, f) cross-sectional view.

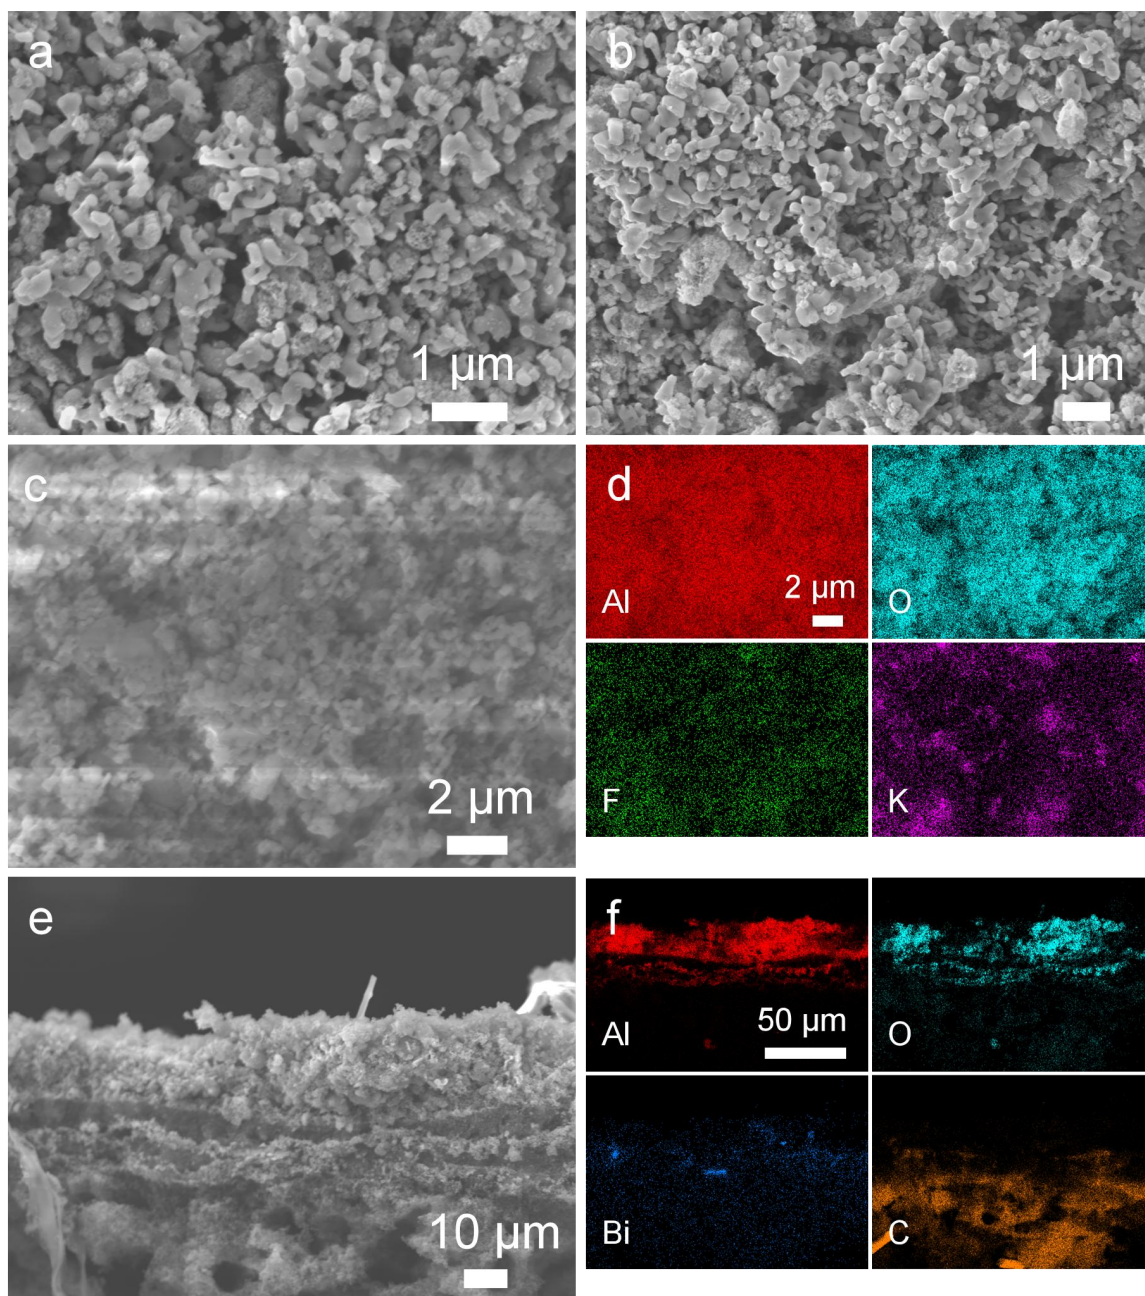

**Fig. S48.** SEM images of the  $\text{Al}_2\text{O}_3/\text{CEI-Bi}$  electrode (a) before and (b) after the durability test. SEM images and corresponding EDS elemental maps of the  $\text{Al}_2\text{O}_3/\text{CEI-Bi}$  electrode after the durability test: (c, d) surface view and (e, f) cross-sectional view.

**Table S4.** Porosity of various coating layers and  $C_{2+}$  FE at  $600 \text{ mA cm}^{-2}$  on the corresponding coated Cu electrodes. Notably, within the nanoscale regime (40–200 nm), the variation in coating porosity cannot be solely attributed to particle size, as factors, e.g., particle aggregation, size distribution, and coating formation process, also play important roles. Consequently, coatings with similar filler sizes exhibited markedly different porosities. Moreover, no clear correlation between porosity and catalytic performance was observed.

| Coating                                 | C/CEI                                                    | CNTs/CEI                  | $Al_2O_3$ /CEI            | $CeO_2$ /CEI            | $TiO_2$ /CEI              |
|-----------------------------------------|----------------------------------------------------------|---------------------------|---------------------------|-------------------------|---------------------------|
| Porosity                                | 70.6%                                                    | 78.9%                     | 80.2%                     | 32.0%                   | 65.3%                     |
| $C_{2+}$ FE at $600 \text{ mA cm}^{-2}$ | 61.5% (~2.3 $\mu\text{m}$ )<br>55.5% (~5 $\mu\text{m}$ ) | 64.8% (~2 $\mu\text{m}$ ) | 76.7% (~5 $\mu\text{m}$ ) | 67% (~5 $\mu\text{m}$ ) | 51.2% (~5 $\mu\text{m}$ ) |

**Table S5.** Comparison of the acidic CO<sub>2</sub> electrolysis performance for Al<sub>2</sub>O<sub>3</sub>/CEI<sub>Low</sub>-Cu electrode with previously reported catalysts under acidic conditions.

| Reference                                            | Catalyst                                               | Electrolyte                                                                                                                | FE <sub>C2+</sub> ,<br>max (%)       | j <sub>C2+, max</sub><br>(mA cm <sup>-2</sup> ) | Stability (h)                  | SPCE<br>(%)              |
|------------------------------------------------------|--------------------------------------------------------|----------------------------------------------------------------------------------------------------------------------------|--------------------------------------|-------------------------------------------------|--------------------------------|--------------------------|
| Our work                                             | Al <sub>2</sub> O <sub>3</sub> /CEI <sub>Low</sub> -Cu | 0.5 M K <sub>2</sub> SO <sub>4</sub> (pH 2)                                                                                | 81.3                                 | 556.6                                           | 63 at 500 mA cm <sup>-2</sup>  | 35.2                     |
|                                                      |                                                        | 0.1 M K <sub>2</sub> SO <sub>4</sub> (pH 2)                                                                                | 73.5                                 | 419.2                                           | 195 at 200 mA cm <sup>-2</sup> | N/A                      |
|                                                      |                                                        | 0.05 M K <sub>2</sub> SO <sub>4</sub> (pH 2)                                                                               | 71.9                                 | 358.7                                           | N/A                            | N/A                      |
| Nat. Synth., 2023, <b>2</b> , 403–412.               | COF:PFSA-modified Cu                                   | 3 M K <sup>+</sup> (pH 1)                                                                                                  | 78                                   | 301                                             | 30 at 200 mA cm <sup>-2</sup>  | 75                       |
| Angew. Chem. Int. Ed., 2023, <b>62</b> , e202300226. | SiC-Nafion/Cu/PTFE                                     | 3 M KCl (pH 1)                                                                                                             | 45 for C <sub>2</sub> H <sub>4</sub> | N/A                                             | 30 at 100 mA cm <sup>-2</sup>  | N/A                      |
| Angew. Chem. Int. Ed., 2023, <b>62</b> , e202216102. | GDE Modified Cu/PTFE                                   | 0.1 M KHPO <sub>4</sub> (pH 2)                                                                                             | 55.2                                 | 27.61                                           | 6 at 50 mA cm <sup>-2</sup>    | N/A                      |
| Adv. Funct. Mater., 2025, <b>35</b> , 2425636.       | Cu/ABSA-PANI                                           | 1M KCl (pH 1)                                                                                                              | 81                                   | 700                                             | 11 at 600 mA cm <sup>-2</sup>  | 52.5                     |
| Nat. Nanotechnol., 2024, <b>19</b> , 311–318.        | CoPc@HC/Cu                                             | 0.5 M H <sub>3</sub> PO <sub>4</sub> + 0.5 M KH <sub>2</sub> PO <sub>4</sub> + 2.5 M KCl                                   | 79.6                                 | 698                                             | 16 at 800 mA cm <sup>-2</sup>  | 90                       |
| Angew. Chem. Int. Ed., 2025, <b>65</b> , e16139      | ZNS-Nafion/Cu                                          | 0.5 M H <sub>3</sub> PO <sub>4</sub> + 0.5 M KH <sub>2</sub> PO <sub>4</sub> + 0.5 M K <sub>2</sub> SO <sub>4</sub> (pH 2) | 80.9                                 | 484                                             | 10 at 300 mA cm <sup>-2</sup>  | 33                       |
| Nat. Commun., 2025, <b>16</b> , 10727.               | YSZ/CuO                                                | 3 M KCl (pH 2)                                                                                                             | 81.6                                 | 808                                             | 14 at 400 mA cm <sup>-2</sup>  | 56.8                     |
| ACS Catal., 2025, <b>15</b> , 19227–19237            | dCu(OH) <sub>2</sub> /Ca <sub>1/20</sub>               | 3 M KCl (pH 2)                                                                                                             | 81.2                                 | 568                                             | 10 at 700 mA cm <sup>-2</sup>  | 31.2 for EtOH            |
| ACS Catal. 2024, <b>14</b> , 8310–8316               | Cu-I <sub>2</sub>                                      | 0.05 M H <sub>2</sub> SO <sub>4</sub> /0.3 M KI/20 mM I <sup>2</sup>                                                       | 71.02                                | 420                                             | 8 at 500 mA cm <sup>-2</sup>   | 54                       |
| J. Am. Chem. Soc., 2026, <b>148</b> , 13444–13453.   | Zr <sub>1.0%</sub> -Cu/BTD                             | 3 M KCl (pH 1.5)                                                                                                           | 74.9                                 | 438                                             | 24 at 300 mA cm <sup>-2</sup>  | 79.9 for C <sub>2+</sub> |
| J. Am. Chem. Soc., 2026, <b>148</b> , 7159–7170      | PTNs/PCN-Ni/Cu                                         | 0.25 M K <sub>2</sub> SO <sub>4</sub> (pH 2)                                                                               | 86.2                                 | 344.4                                           | 227 at 200 mA cm <sup>-2</sup> | 53.4                     |
| Nat. Synth., 2025, <b>4</b> , 262–270.               | Cu-DACs                                                | 2.5 M KCl (pH 1)                                                                                                           | 91                                   | 164                                             | 10 at 150 mA cm <sup>-2</sup>  | 78                       |

Note: Minor deviations may exist due to data extracted from figures.

## Reference

1. Y. Xie, P. Ou, X. Wang, Z. Xu, Y. C. Li, Z. Wang, J. E. Huang, J. Wicks, C. McCallum, N. Wang, Y. Wang, T. Chen, B. T. W. Lo, D. Sinton, J. C. Yu, Y. Wang and E. H. Sargent, *Nat. Catal.*, 2022, **5**, 564-570.
2. L.-C. Weng, A. T. Bell and A. Z. Weber, *Energy Environ. Sci.*, 2019, **12**, 1950-1968.
3. S. Gondal, N. Asif, H. F. Svendsen and H. Knuutila, *Chem. Eng. Sci.*, 2015, **123**, 487-499.
4. K. G. Schulz, U. Riebesell, B. Rost, S. Thoms and R. E. Zeebe, *Mar. Chem.*, 2006, **100**, 53-65.
5. G. Kresse and J. Furthmüller, *Comput. Mater. Sci.*, 1996, **6**, 15-50.
6. G. Kresse and J. Furthmüller, *Phys. Rev. B*, 1996, **54**, 11169-11186.
7. P. E. Blochl, *Phys. Rev. B*, 1994, **50**, 17953-17979.
8. J. P. Perdew and Y. Wang, *Phys. Rev. B*, 1992, **46**, 12947-12954.
9. J. P. Perdew, K. Burke and M. Ernzerhof, *Phys. Rev. Lett.*, 1996, **77**, 3865-3868.
10. S. Grimme, J. Antony, S. Ehrlich and H. Krieg, *J. Chem. Phys.*, 2010, **132**, 154104.
11. J. Wu, G. Gao, G. Wu, B. Liu, H. Yang, X. Zhou and J. Wang, *Phys. Chem. Chem. Phys.*, 2014, **16**, 22974-22978.
12. T. D. Kuhne, M. Iannuzzi, M. Del Ben, V. V. Rybkin, P. Seewald, F. Stein, T. Laino, R. Z. Khaliullin, O. Schutt, F. Schiffmann, D. Golze, J. Wilhelm, S. Chulkov, M. H. Bani-Hashemian, V. Weber, U. Borstnik, M. TAILLEFUMIER, A. S. Jakobovits, A. Lazzaro, H. Pabst, T. Muller, R. Schade, M. Guidon, S. Andermatt, N. Holmberg, G. K. Schenter, A. Hehn, A. Bussy, F. Belleflamme, G. Tabacchi, A. Gloss, M. Lass, I. Bethune, C. J. Mundy, C. Plessl, M. Watkins, J. VandeVondele, M. Krack and J. Hutter, *J. Chem. Phys.*, 2020, **152**, 194103.
13. S. Goedecker, M. Teter and J. Hutter, *Phys. Rev. B*, 1996, **54**, 1703-1710.
14. C. Hartwigsen, S. Goedecker and J. Hutter, *Phys. Rev. B*, 1998, **58**, 3641-3662.
15. G. Lippert, J. Hutter and M. Parrinello, *Theor. Chem. Acc.*, 1999, **103**, 124-140.
16. J. VandeVondele and J. Hutter, *J. Chem. Phys.*, 2007, **127**.
17. G. Bussi, D. Donadio and M. Parrinello, *J. Chem. Phys.*, 2007, **126**, 014101.
18. T. Lu and F. Chen, *J. Comput. Chem.*, 2012, **33**, 580-592.
19. T. Lu, *J. Chem. Phys.*, 2024, **161**, 082503
20. J. K. Nørskov, J. Rossmeisl, A. Logadottir and L. Lindqvist, *J. Phys. Chem. B*, 2004, **108**, 17886-17892.
